# Supplementary material for: Evaluation of dual potentiality of 2,4,5-trisubstituted oxazole derivatives as aquaporin-4 inhibitors and anti-inflammatory agents in lung cells
Source: Royal Society of Chemistry journal article supplement (doi:10.1039/d3ra03989g), 2023-01-01

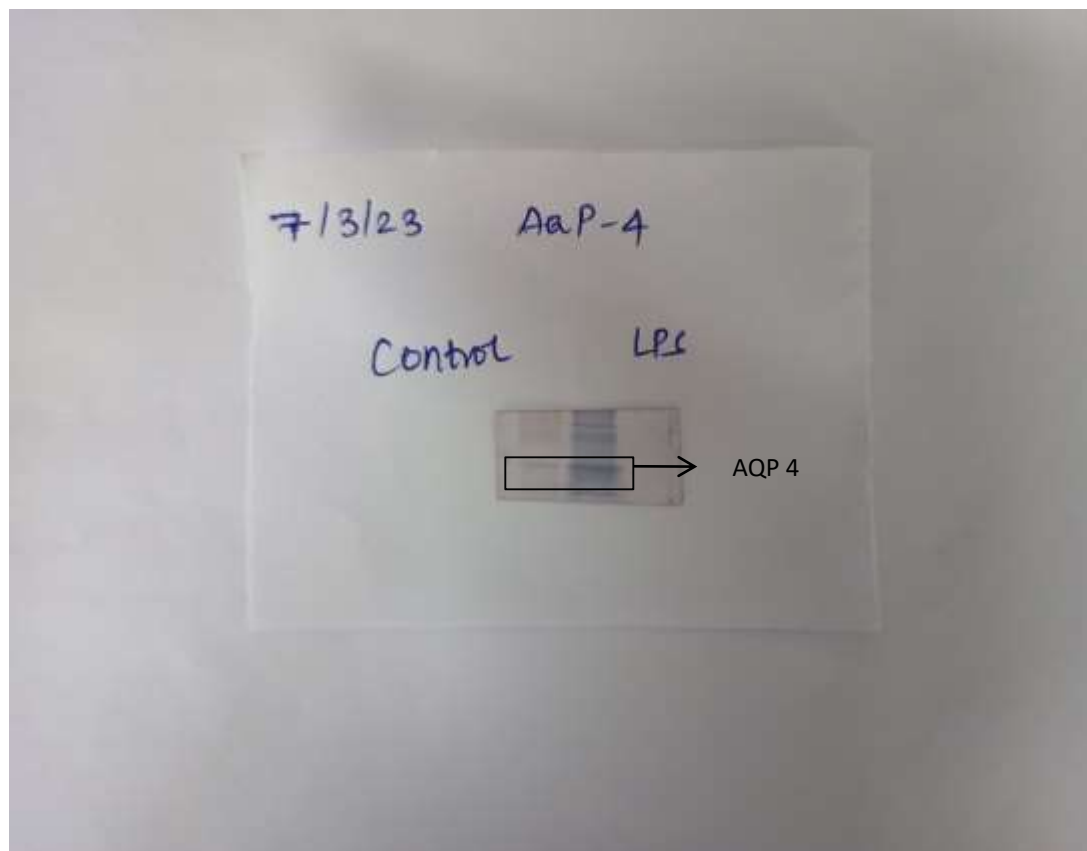

7/3/23

$\beta$ -actin

Control LPS

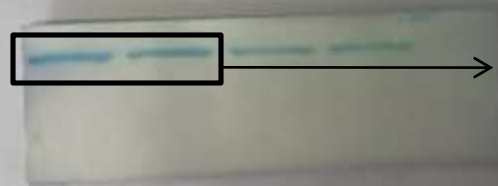

$\beta$ -Actin

7/3/23

Cox -2

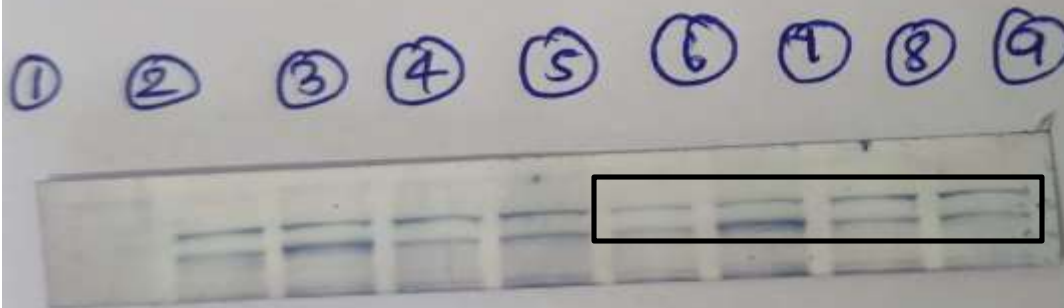

1. Ladder
2. Control
3. LPS
4. 3a
5. 3a+ LPS
6. Control
7. LPS
8. 3a
9. 3a+LPS

# AQP-4

Control

LPS

3a

3a+LPS

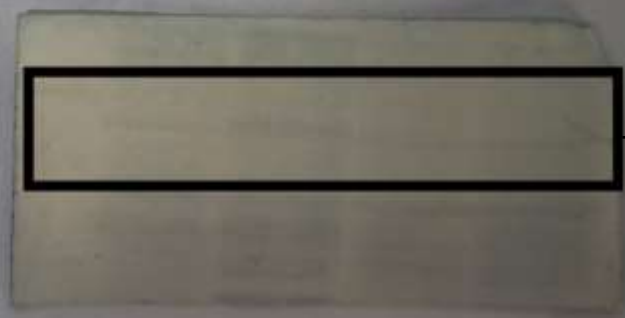

→ AQP4

$\beta$ -actin

Control LPS 3a 3a+LPS

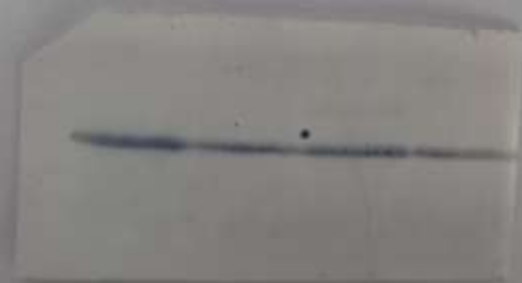

Supplement: d3ra03989g1.pdf [file d3ra03989g1.pdf]
