# Supplementary material for: Evaluation of dual potentiality of 2,4,5-trisubstituted oxazole derivatives as aquaporin-4 inhibitors and anti-inflammatory agents in lung cells
Source: Royal Society of Chemistry journal article supplement (doi:10.1039/d3ra03989g), 2023-01-01
Supplement: d3ra03989g2.pdf [file d3ra03989g2.pdf]

## Supporting Information

### **Evaluation of Dual Potentiality of 2,4,5-Trisubstituted Oxazole Derivatives as Aquaporin-4 Inhibitors and anti-Inflammatory Agents in Lung Cells**

Maniarasu Meenakshi,<sup>a</sup> Arun Kannan,<sup>b</sup> Muralidharan Jothimani,<sup>c</sup> Thangavel Selvi,<sup>a</sup> Muthusamy

Karthikeyan,<sup>c</sup> Chidambaram Prahalathan\*<sup>b</sup> and Kannupal Srinivasan\*<sup>a</sup>

<sup>a</sup>*School of Chemistry, Bharathidasan University, Tiruchirappalli-620024, Tamil Nadu, India.*

<sup>b</sup>*Department of Biochemistry, Bharathidasan University, Tiruchirappalli-620024, Tamil Nadu, India*

<sup>c</sup>*Department of Bioinformatics, Alagappa University, Karaikudi-630 003, Tamil Nadu, India.*

[srinivasank@bdu.ac.in](mailto:srinivasank@bdu.ac.in)

### **Contents**

|                                                                                            |         |
|--------------------------------------------------------------------------------------------|---------|
| A. Copies of IR spectra for products <b>3a-j</b> .....                                     | S2-S11  |
| B. Copies of <sup>1</sup> H and <sup>13</sup> C NMR spectra for products <b>3a-j</b> ..... | S12-S31 |
| C. Copies of HRMS for products <b>3b, 3e-j</b> .....                                       | S32-S38 |
| D. HPLC analysis of product <b>3a</b> .....                                                | S39-S40 |
| E. <i>In-silico</i> analysis of hypothetical products <b>3k-l</b> .....                    | S41-S42 |
| F. 2D interaction diagrams of products <b>3a-j</b> with AQP4.....                          | S43-S58 |

## A. Copies of IR Spectra

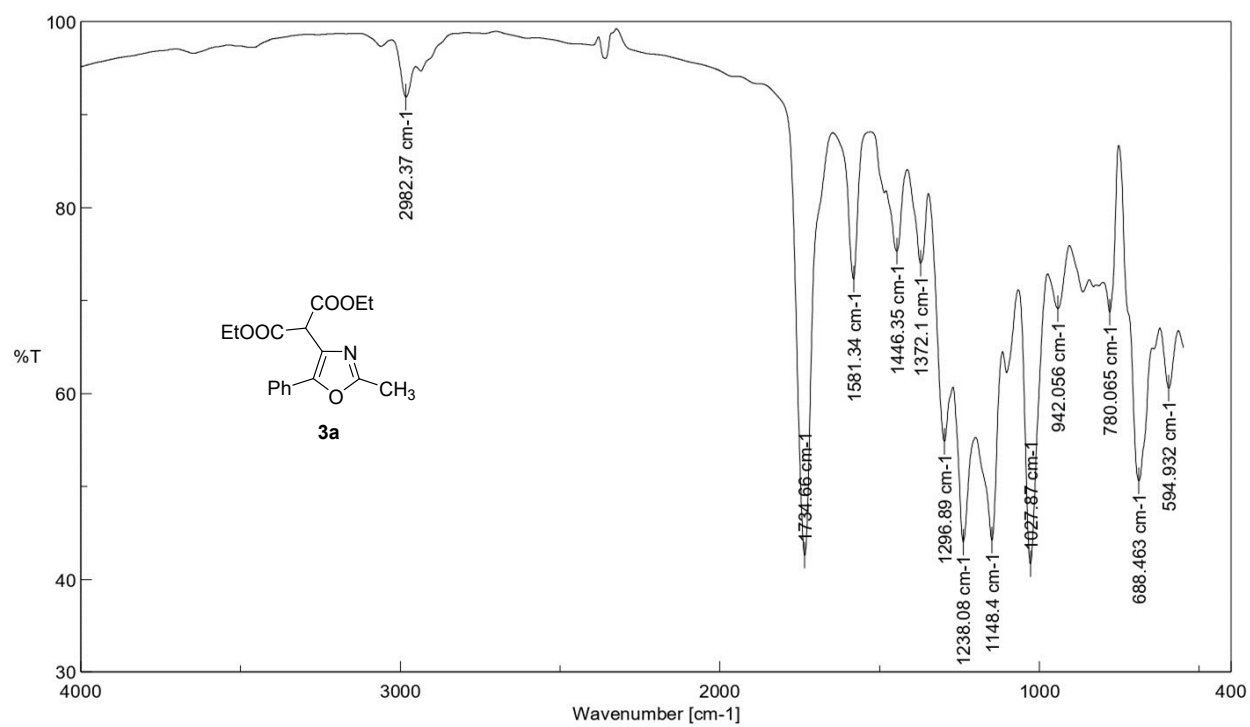

Figure S1. IR spectrum of **3a**

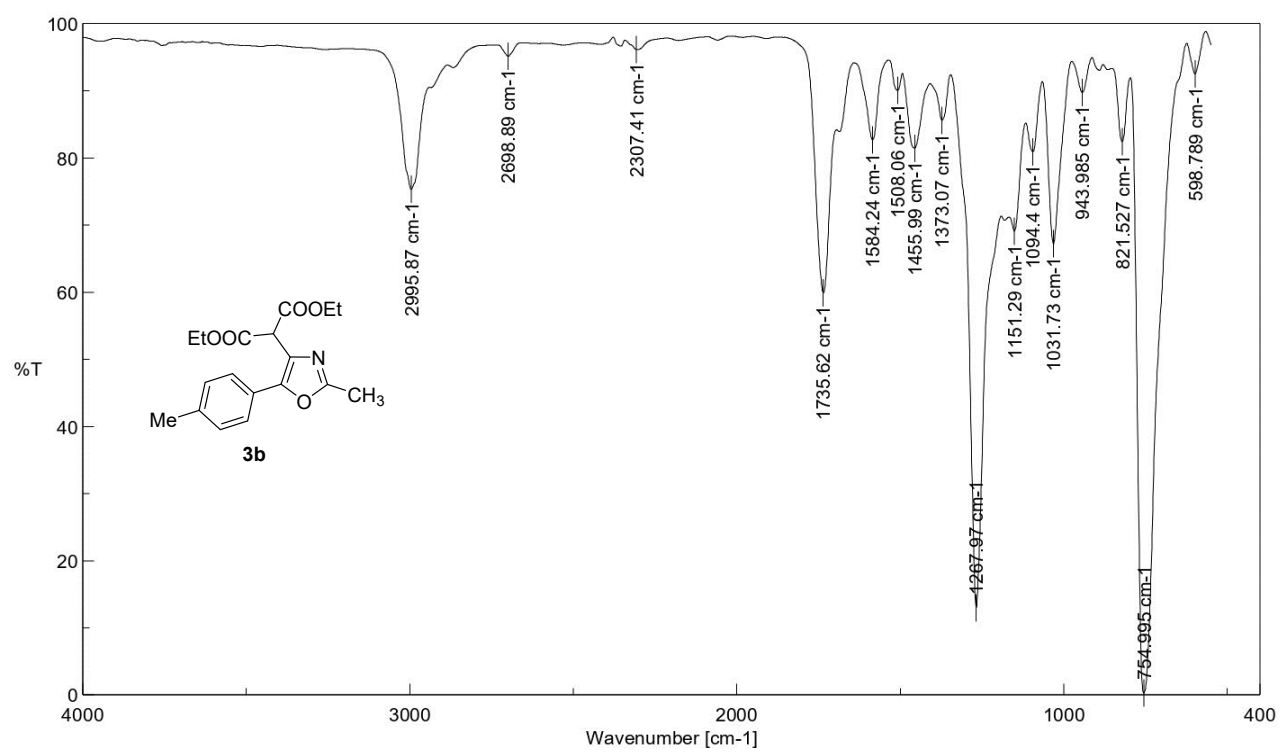

**Figure S2.** IR spectrum of **3b**

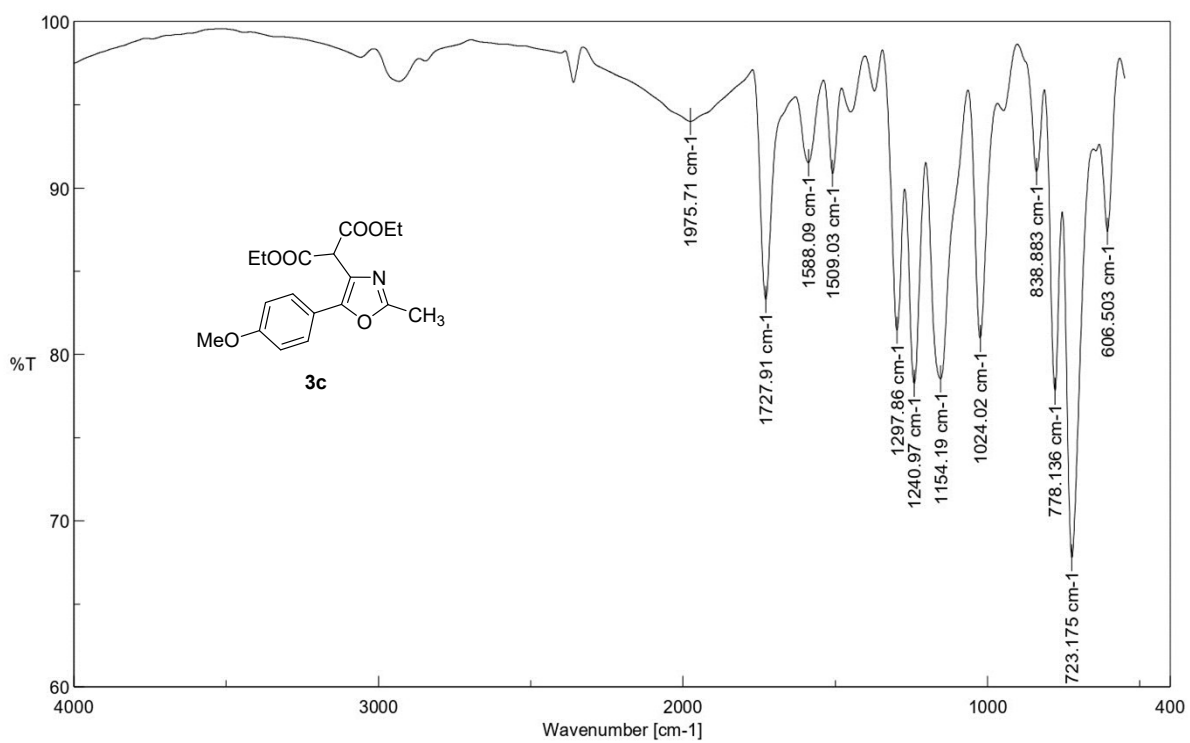

**Figure S3.** IR spectrum of **3c**

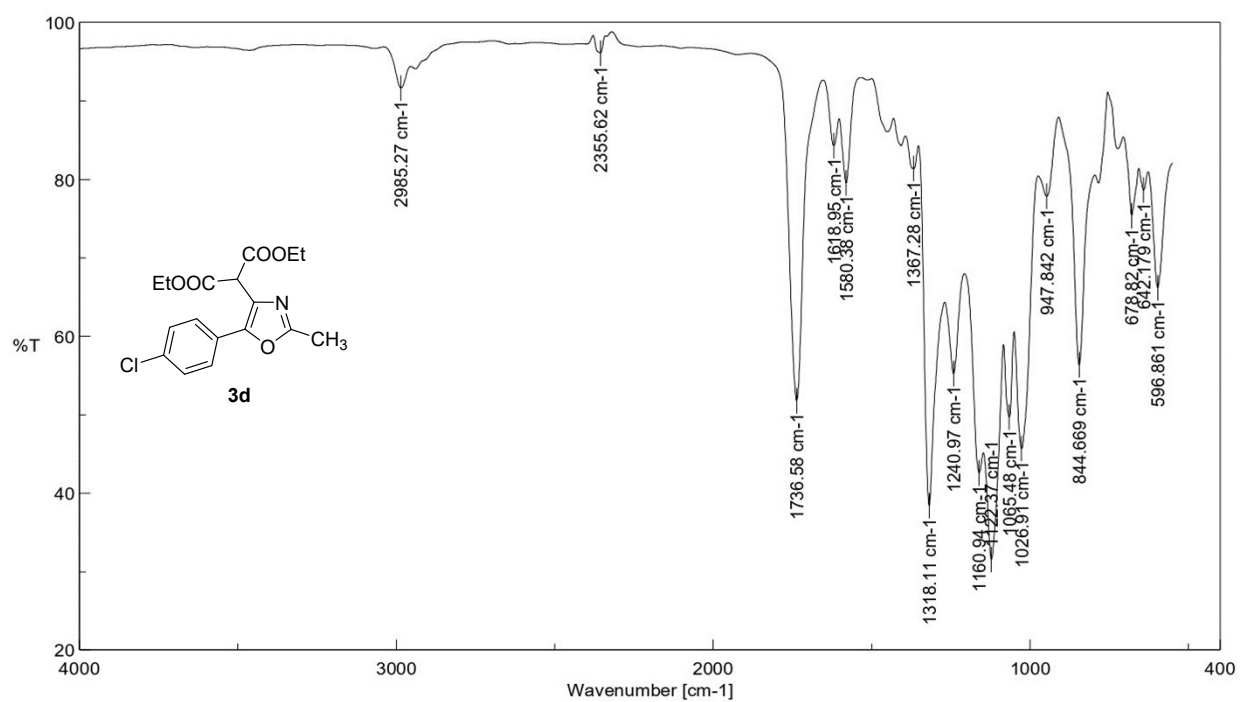

**Figure S4.** IR spectrum of **3d**

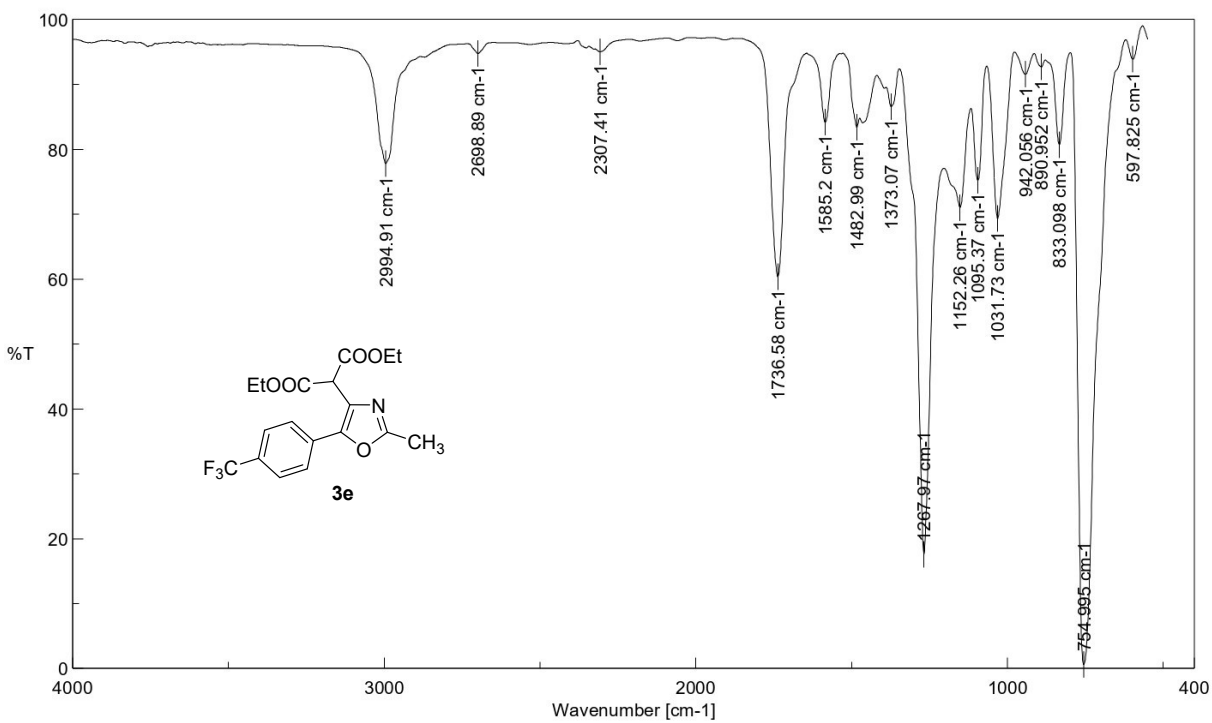

Figure S5. IR spectrum of **3e**

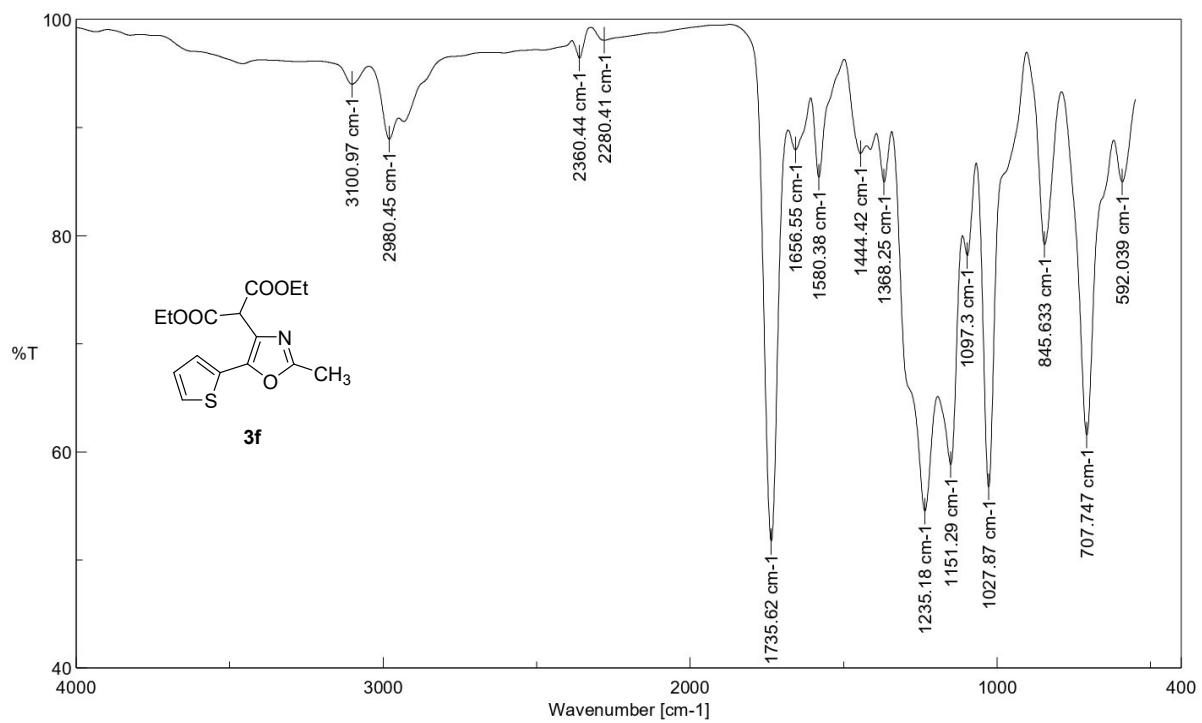

**Figure S6.** IR spectrum of **3f**

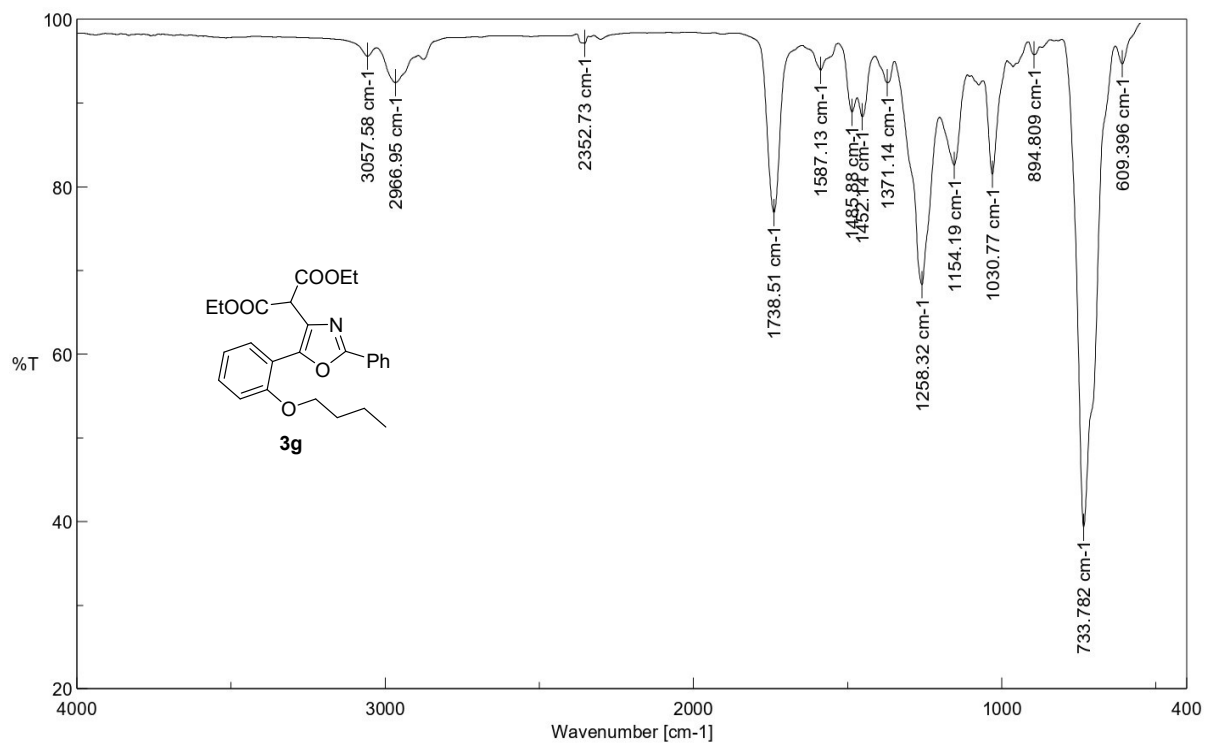

**Figure S7.** IR spectrum of **3g**



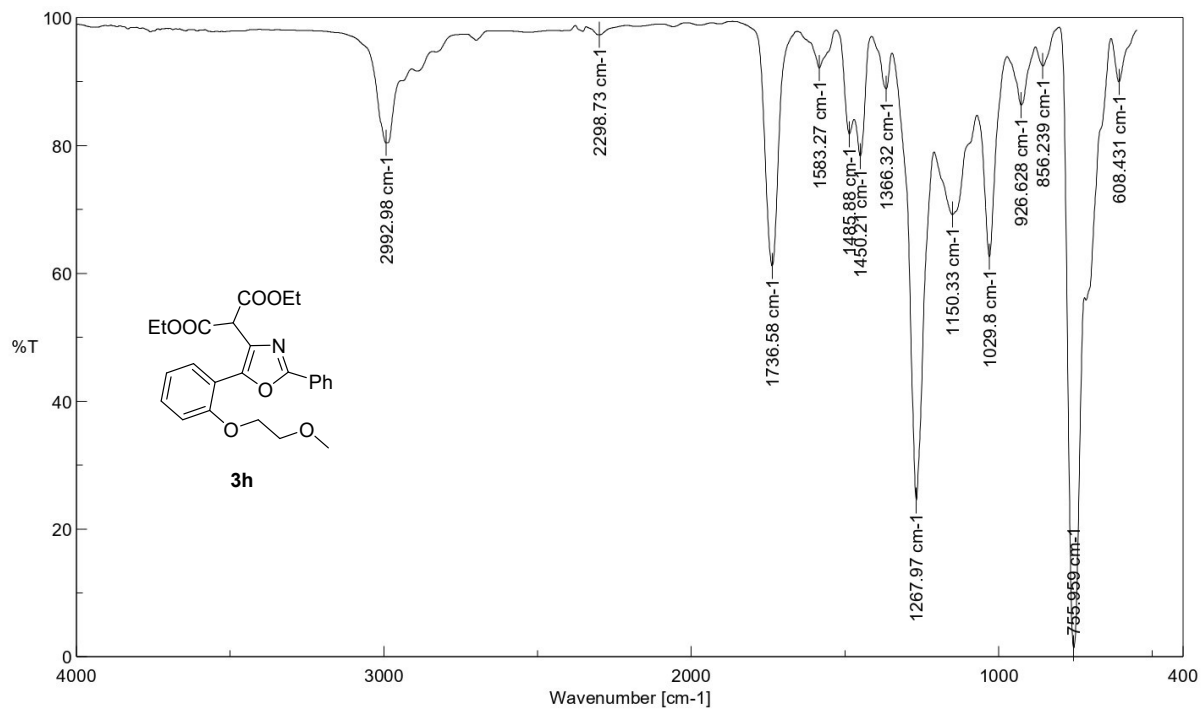

**Figure S8.** IR spectrum of **3h**

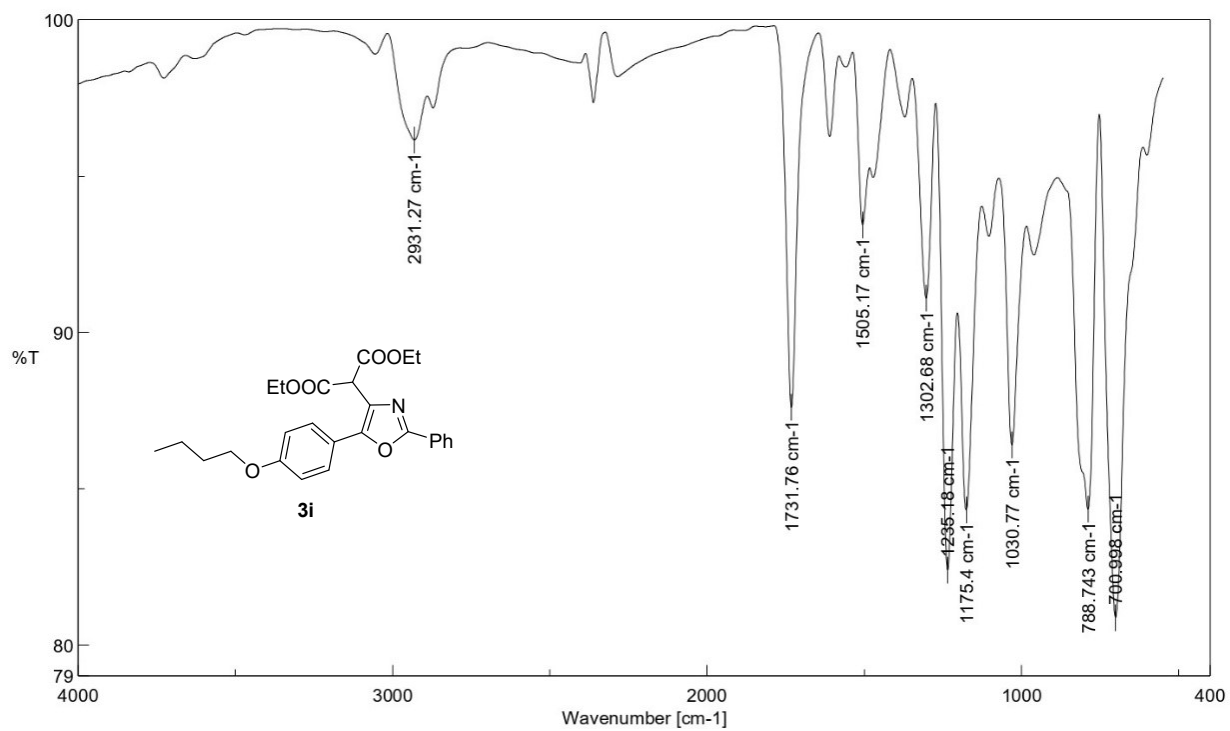

**Figure S9.** IR spectrum of **3i**

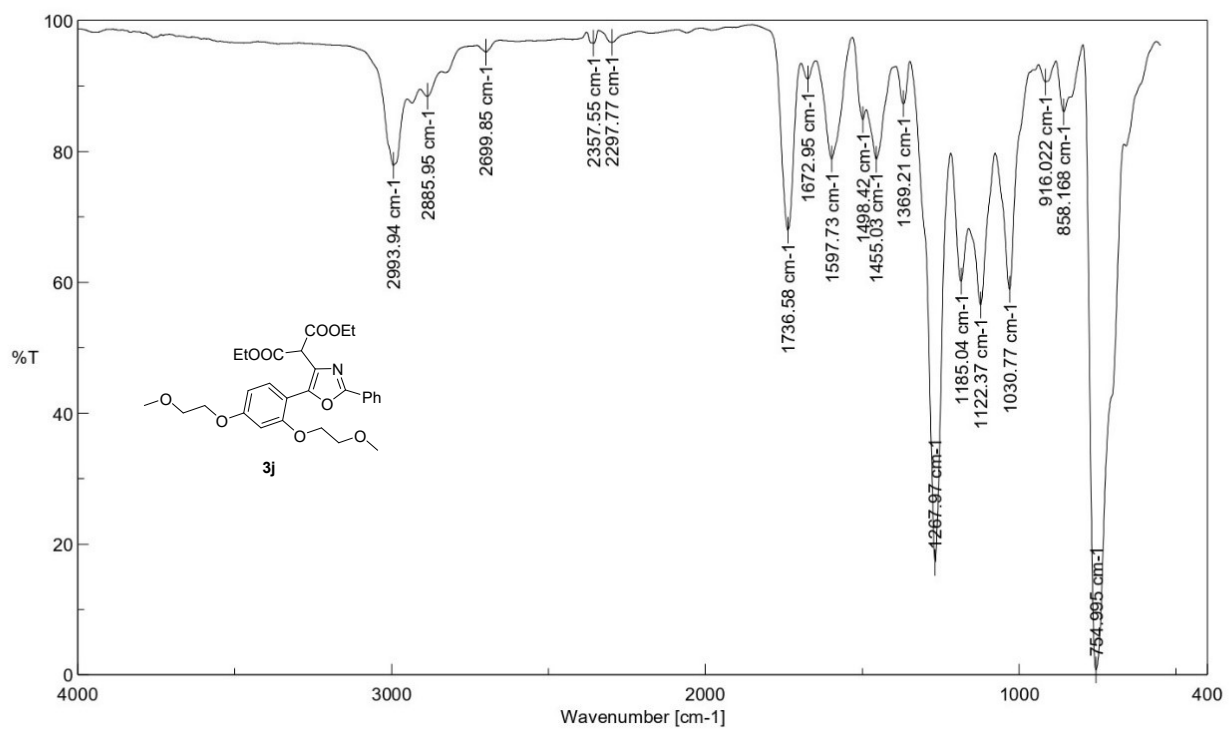

**Figure S10.** IR spectrum of **3j**

## B. Copies of $^1\text{H}$ NMR and $^{13}\text{C}$ NMR Spectra

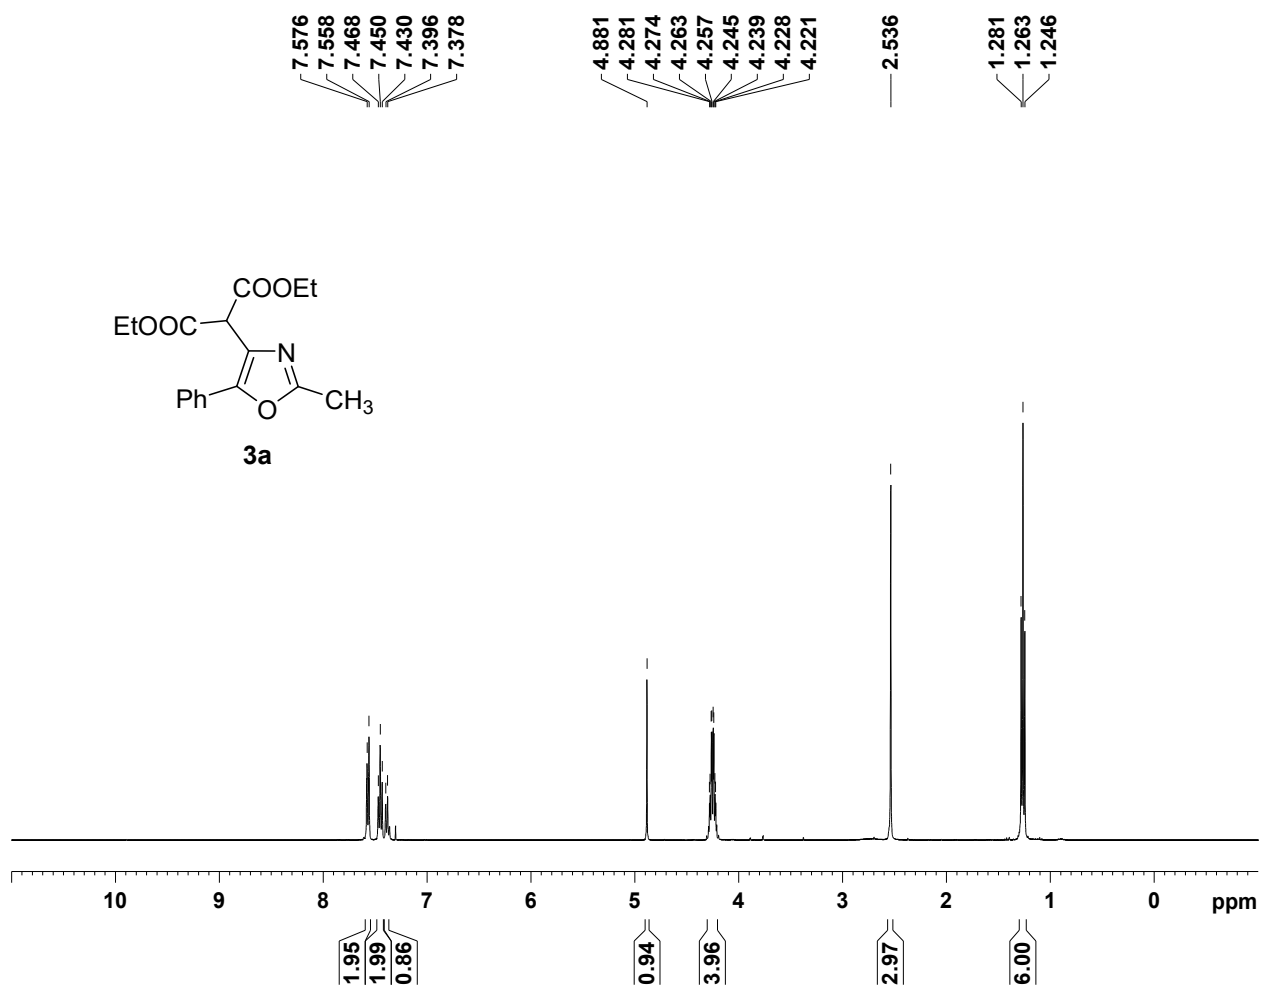

Figure S11.  $^1\text{H}$  NMR (400 MHz,  $\text{CDCl}_3$ ) spectrum of **3a**

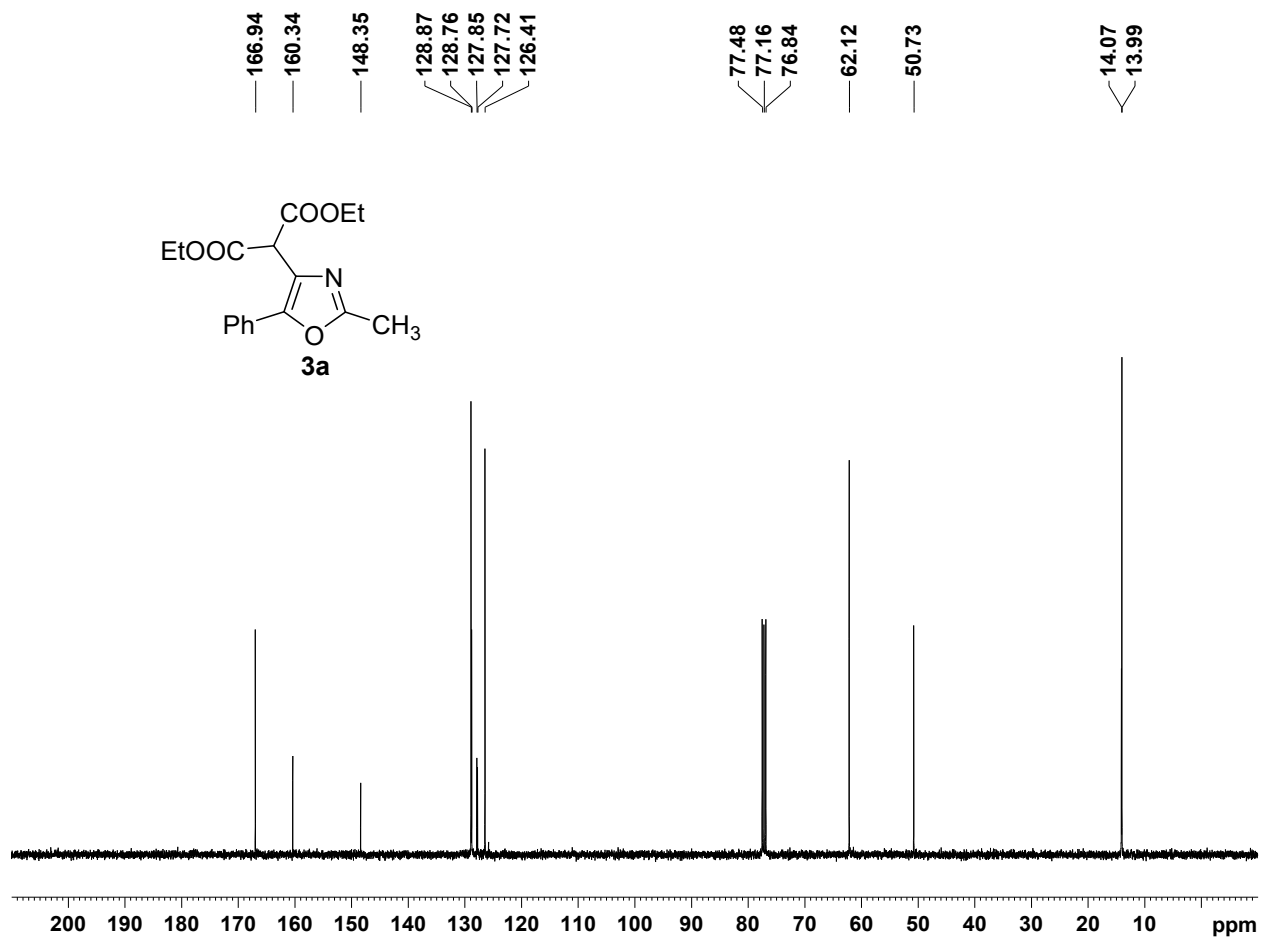

Figure S12.  $^{13}\text{C}$  NMR (100 MHz,  $\text{CDCl}_3$ ) spectrum of **3a**

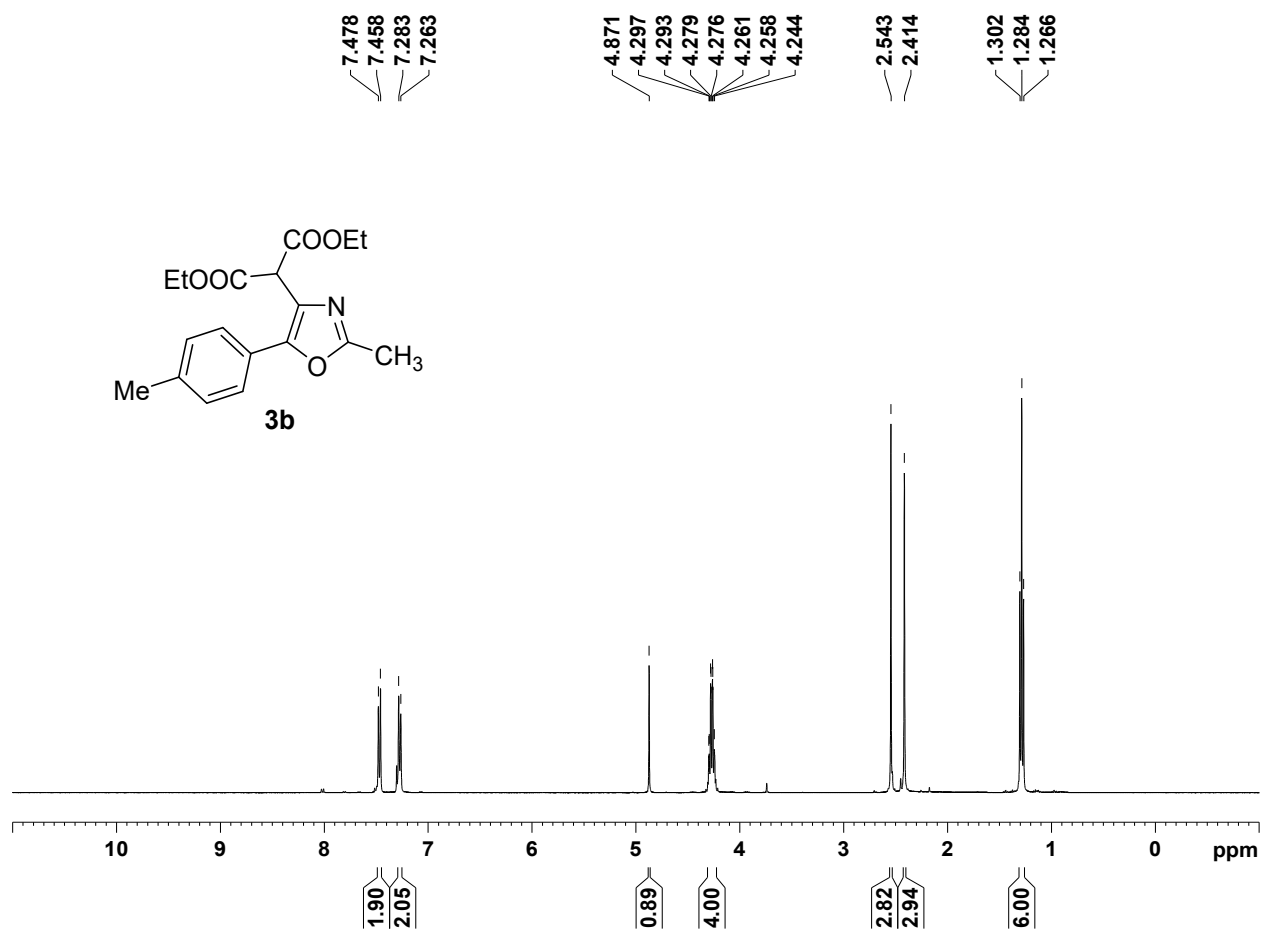

Figure S13. <sup>1</sup>H NMR (400 MHz, CDCl<sub>3</sub>) spectrum of **3b**

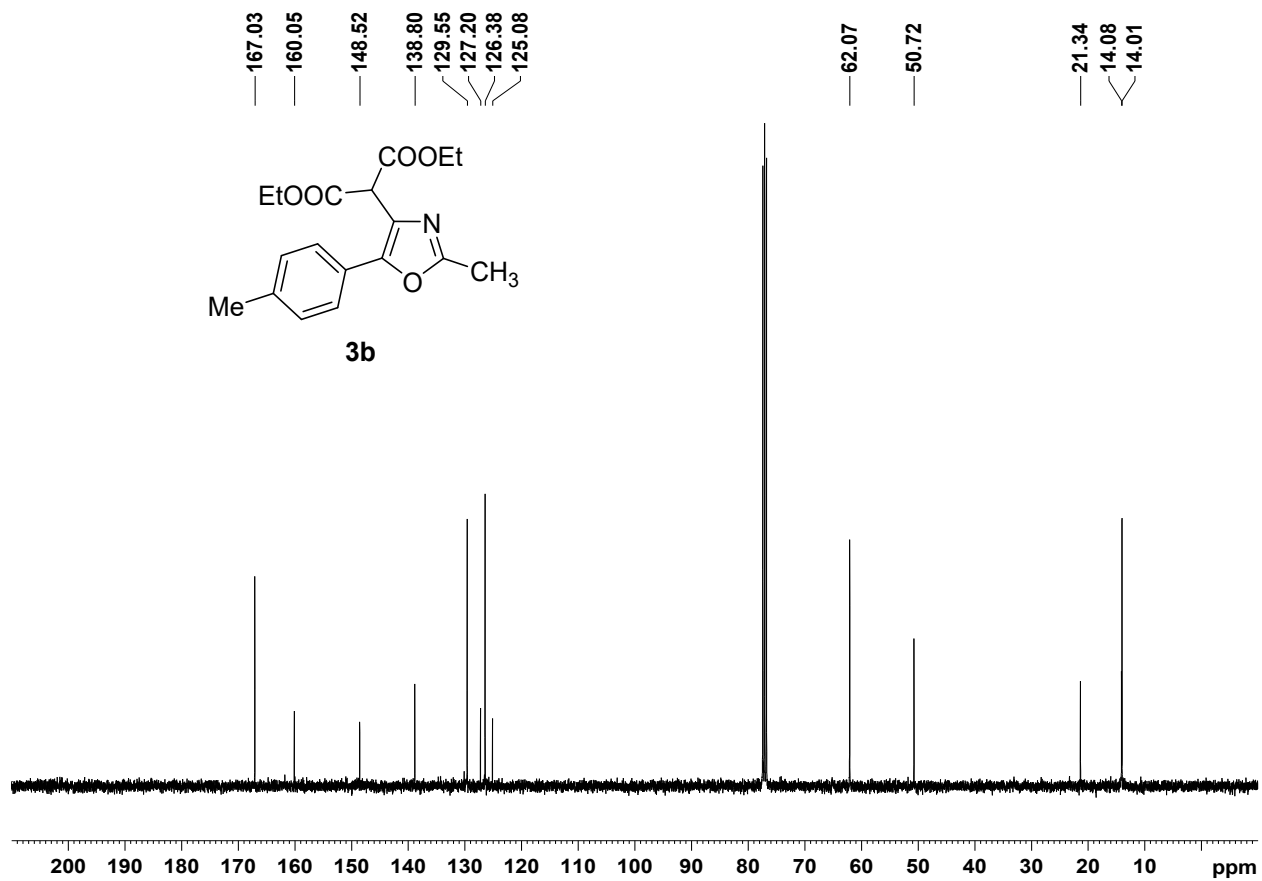

Figure S14. <sup>13</sup>C NMR (100 MHz, CDCl<sub>3</sub>) spectrum of **3b**

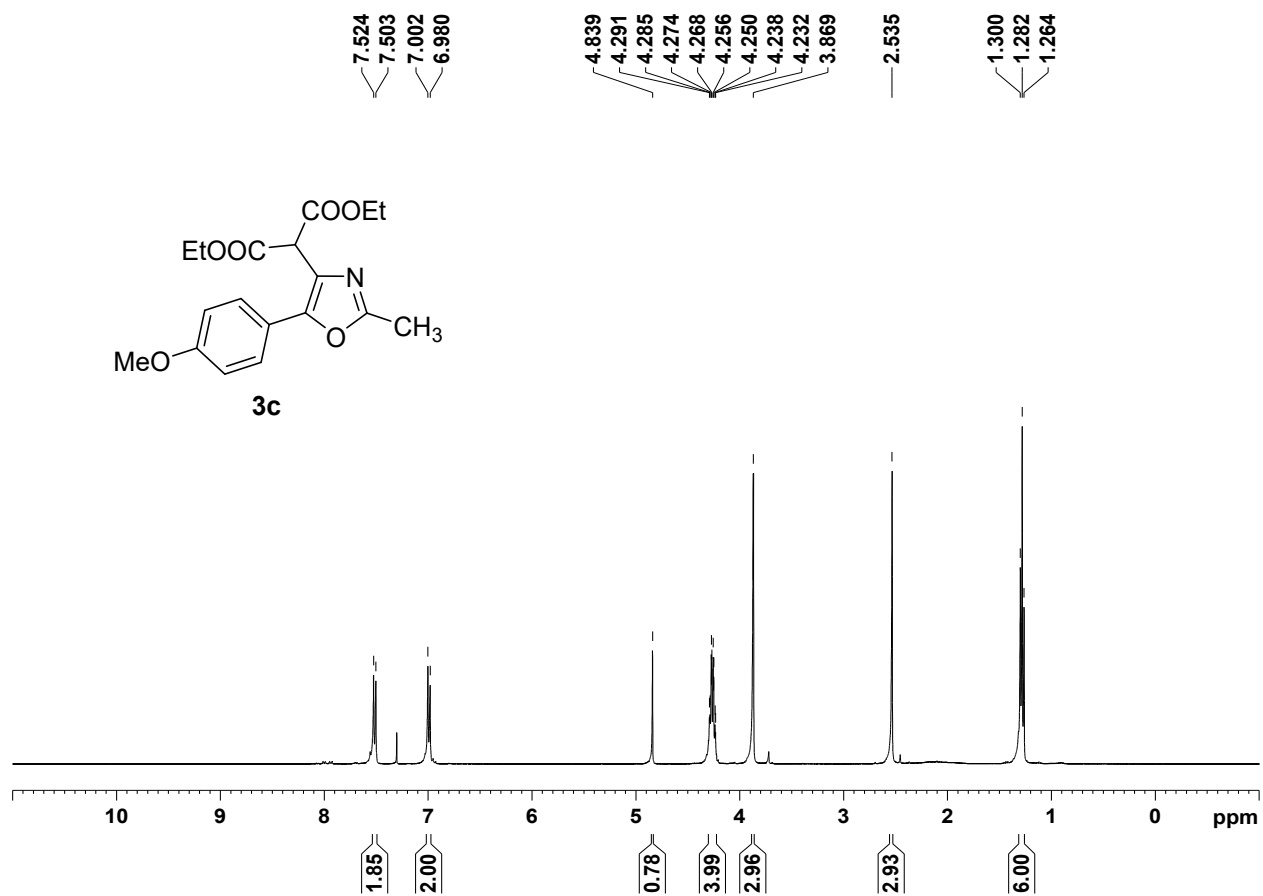

Figure S15. <sup>1</sup>H NMR (400 MHz, CDCl<sub>3</sub>) spectrum of **3c**



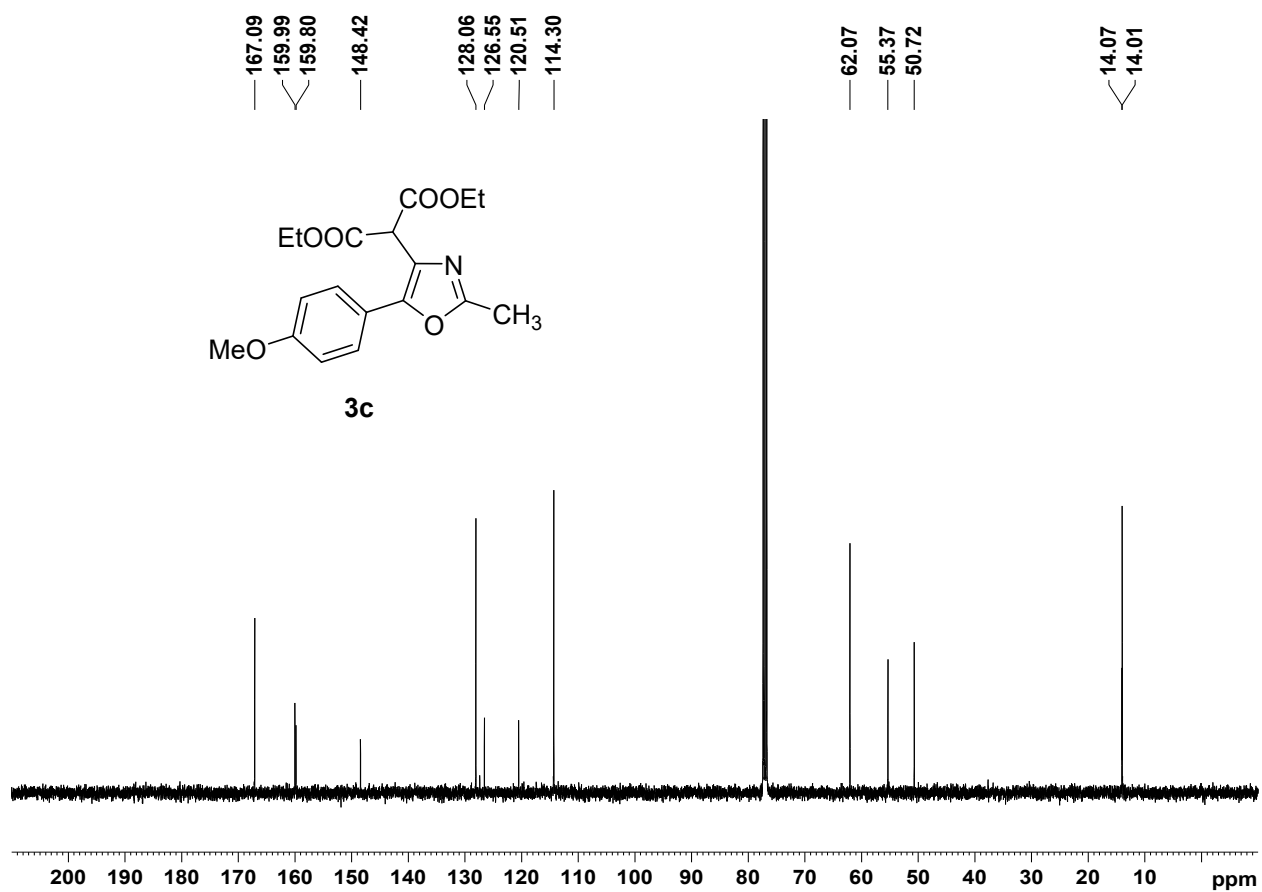

Figure S16. <sup>13</sup>C NMR (100 MHz, CDCl<sub>3</sub>) spectrum of **3c**

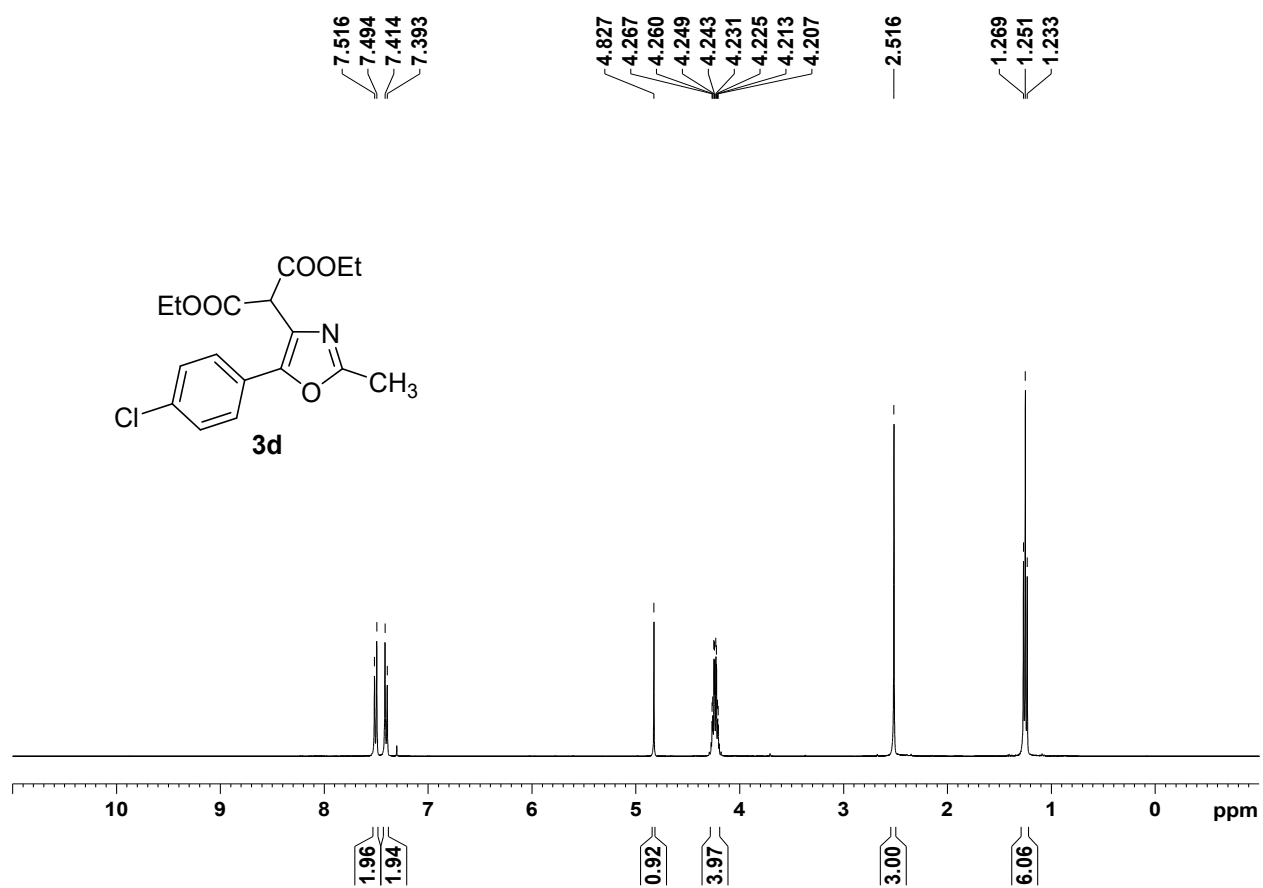

Figure S17. <sup>1</sup>H NMR (400 MHz, CDCl<sub>3</sub>) spectrum of **3d**

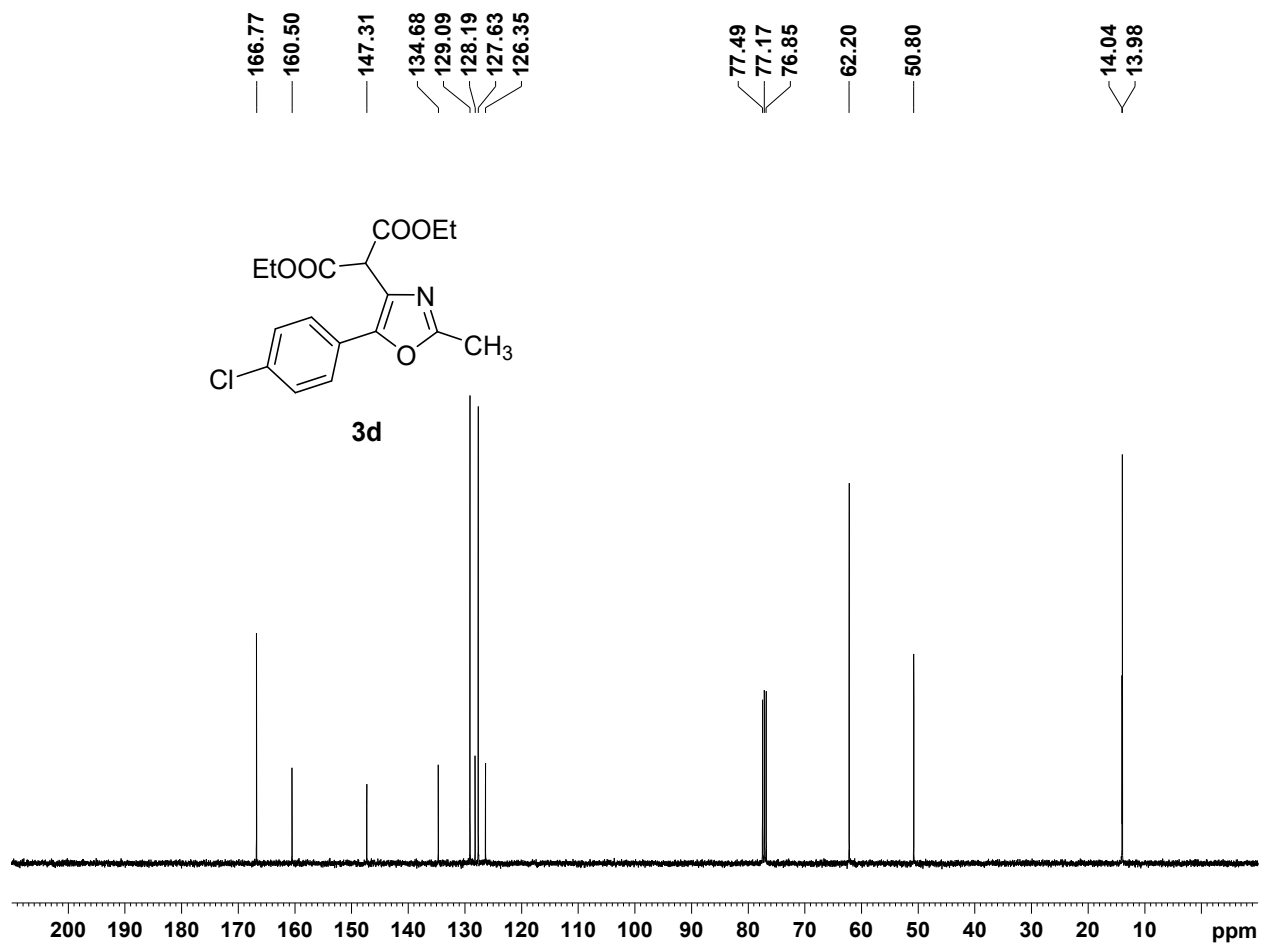

Figure S18. <sup>13</sup>C NMR (100 MHz, CDCl<sub>3</sub>) spectrum of **3d**

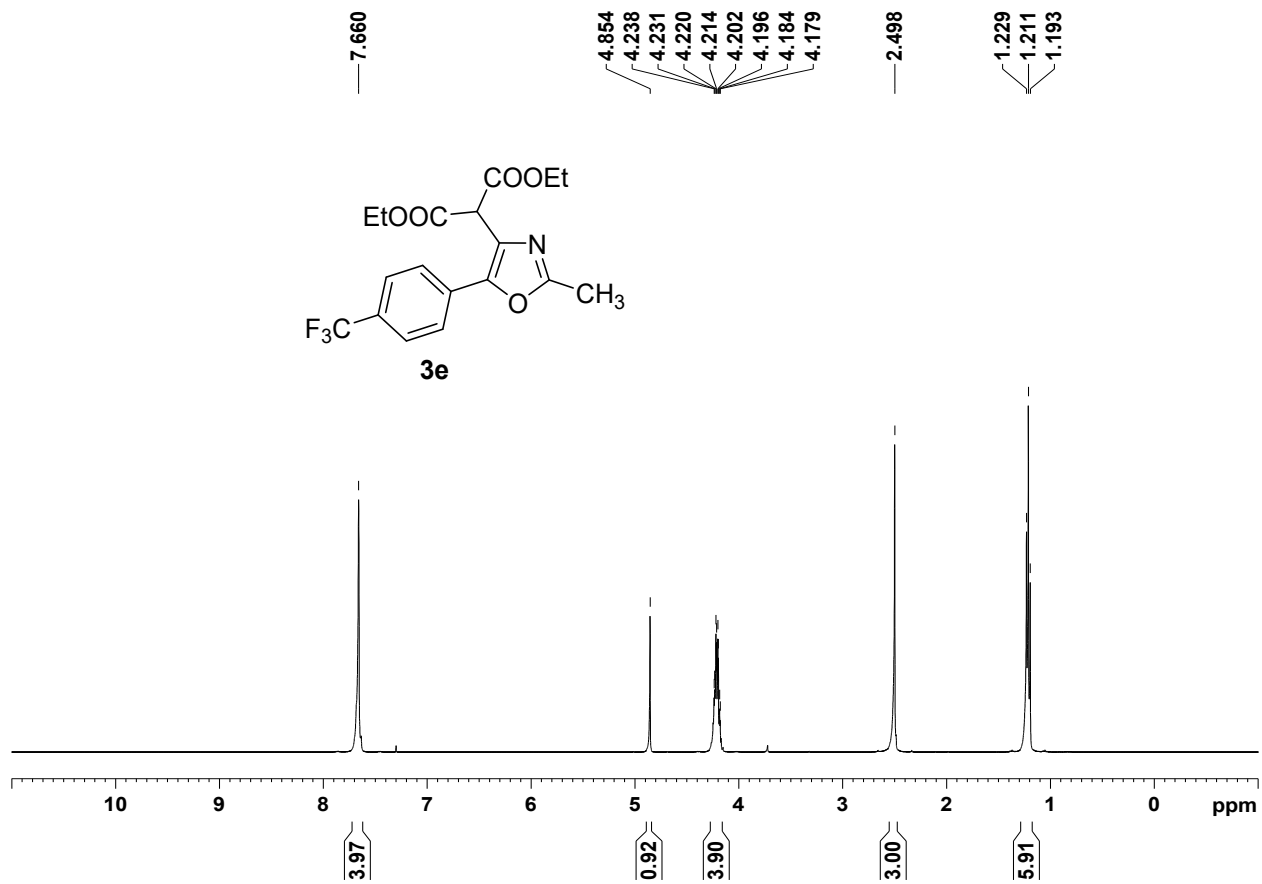

Figure S19. <sup>1</sup>H NMR (400 MHz, CDCl<sub>3</sub>) spectrum of **3e**

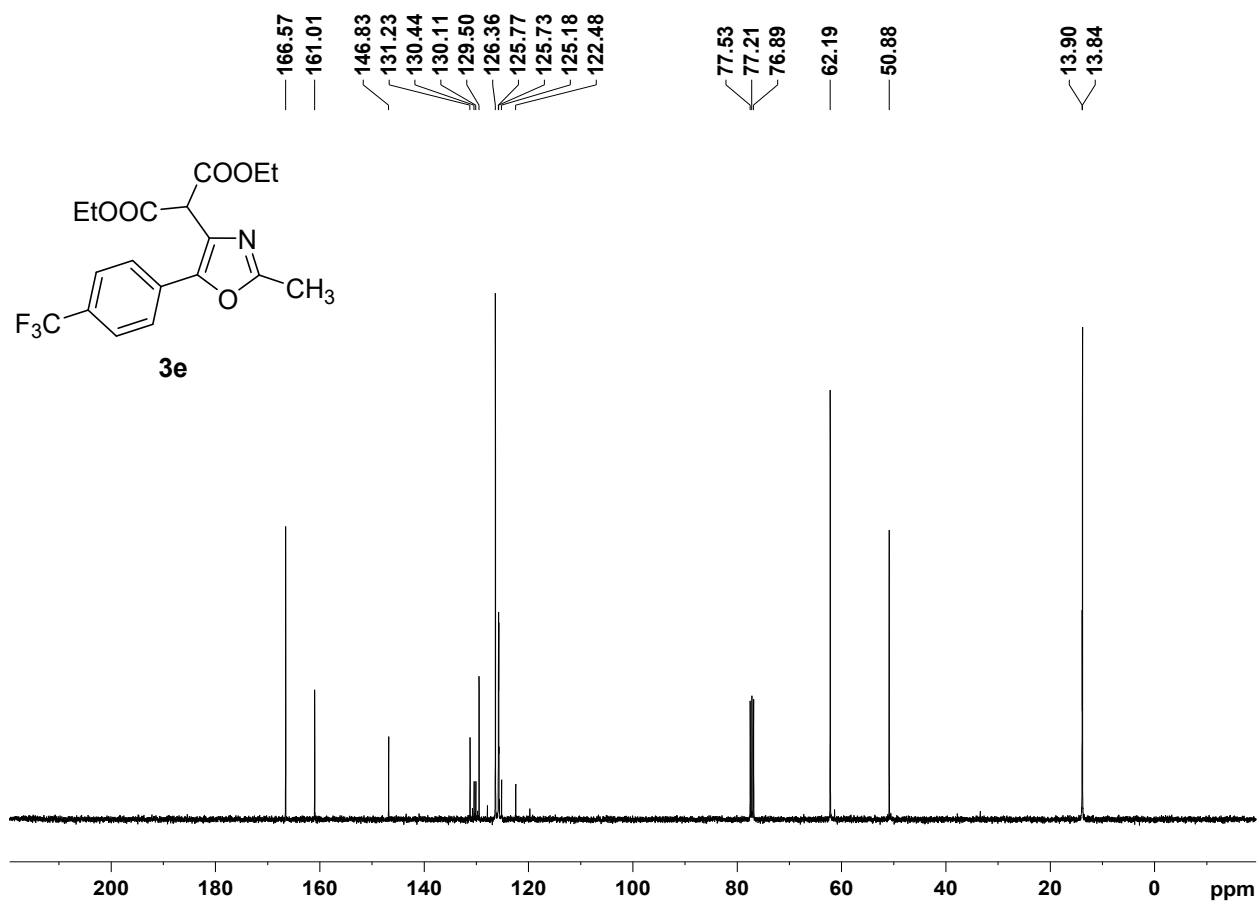

Figure S20. <sup>13</sup>C NMR (100 MHz, CDCl<sub>3</sub>) spectrum of **3e**

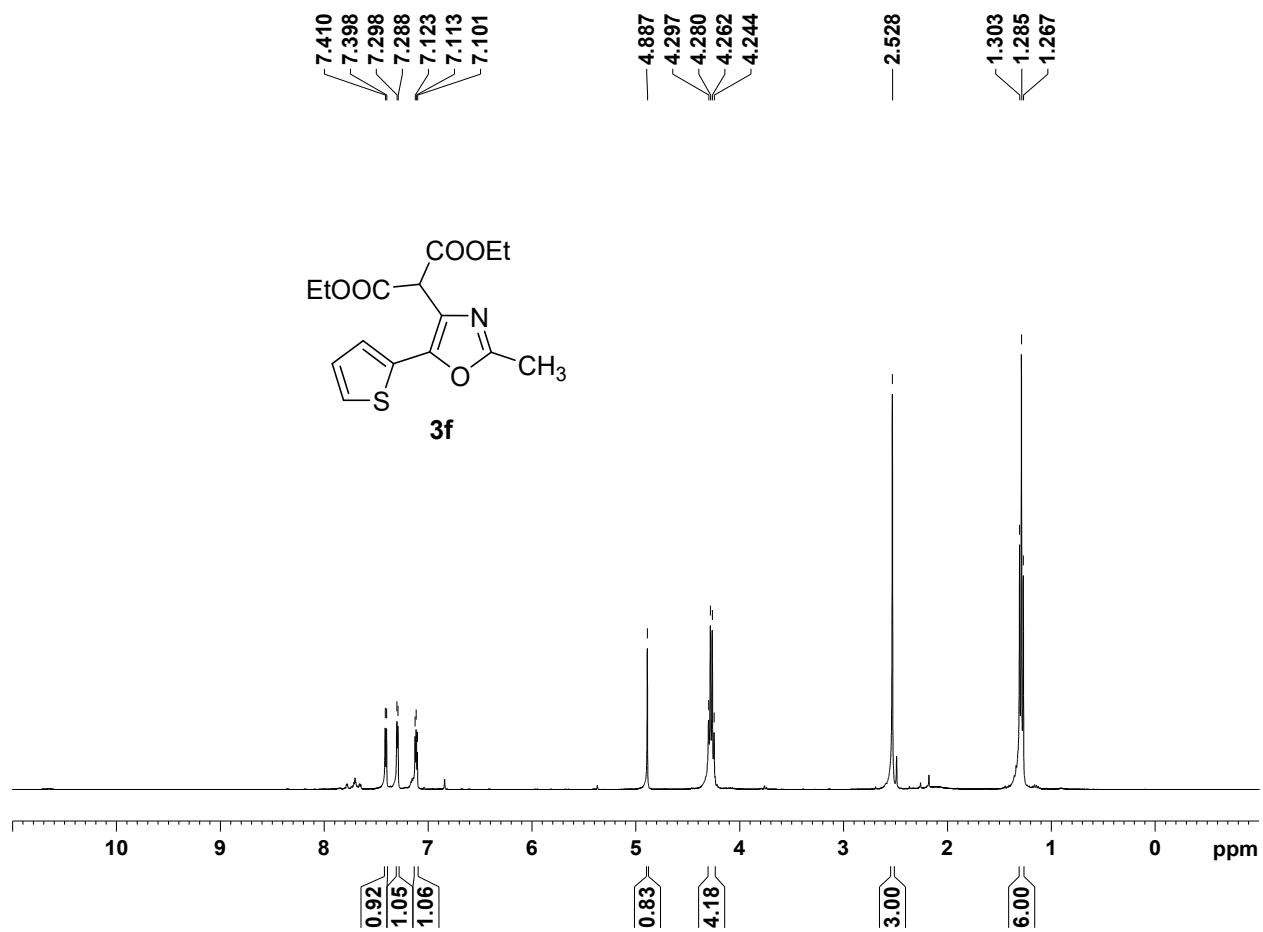

Figure S21. <sup>1</sup>H NMR (400 MHz, CDCl<sub>3</sub>) spectrum of **3f**

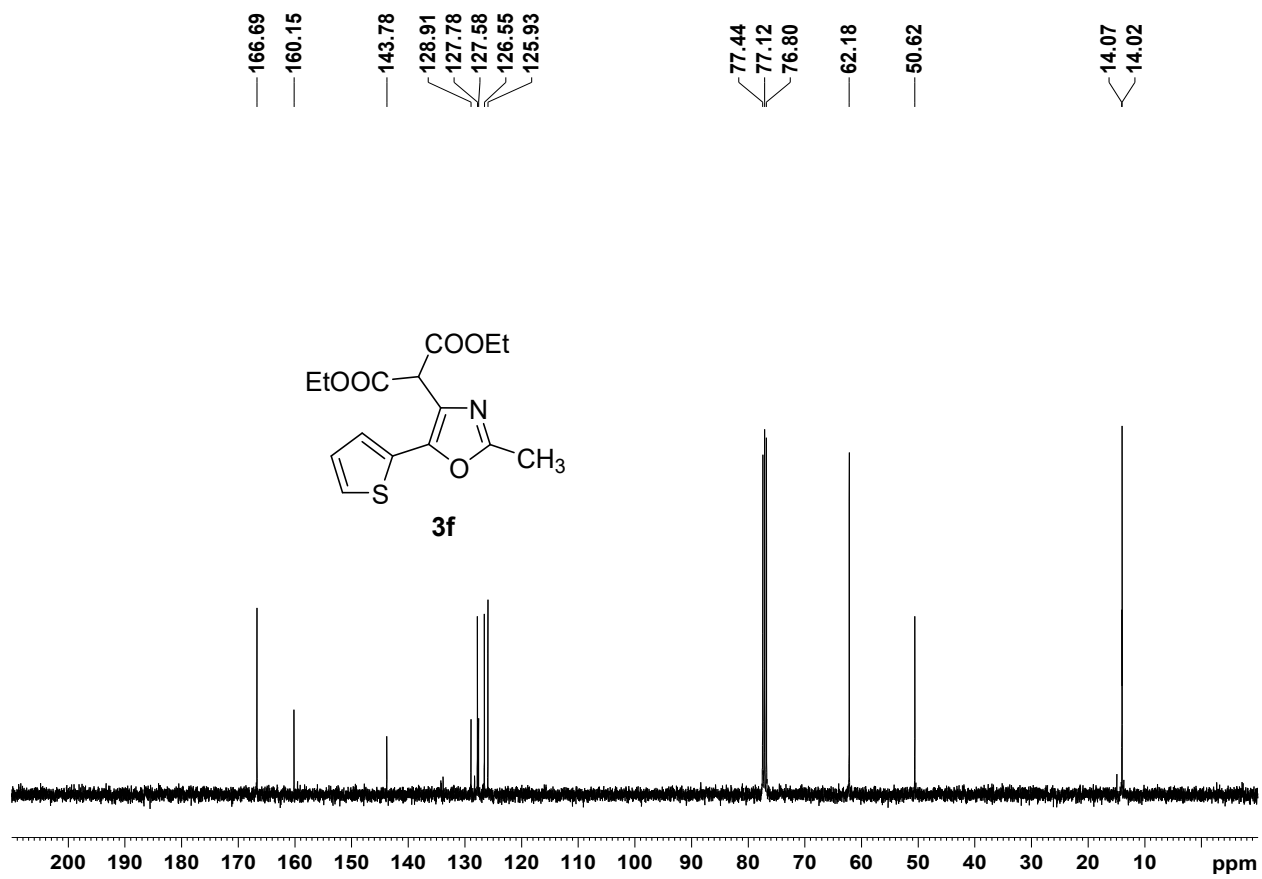

Figure S22. <sup>13</sup>C NMR (100 MHz, CDCl<sub>3</sub>) spectrum of **3f**

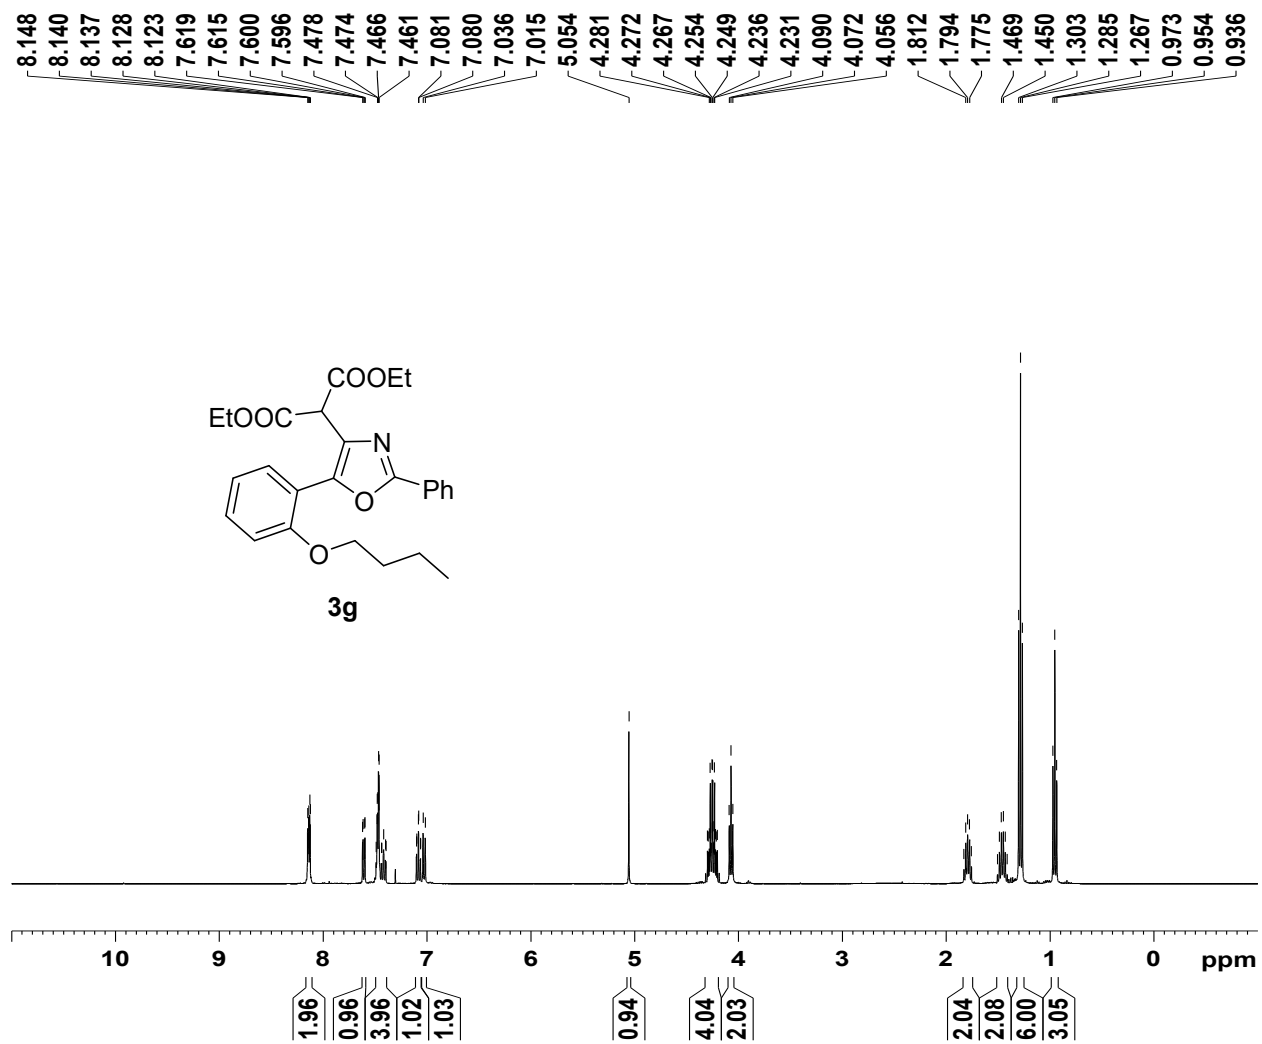

Figure S23. <sup>1</sup>H NMR (400 MHz, CDCl<sub>3</sub>) spectrum of **3g**



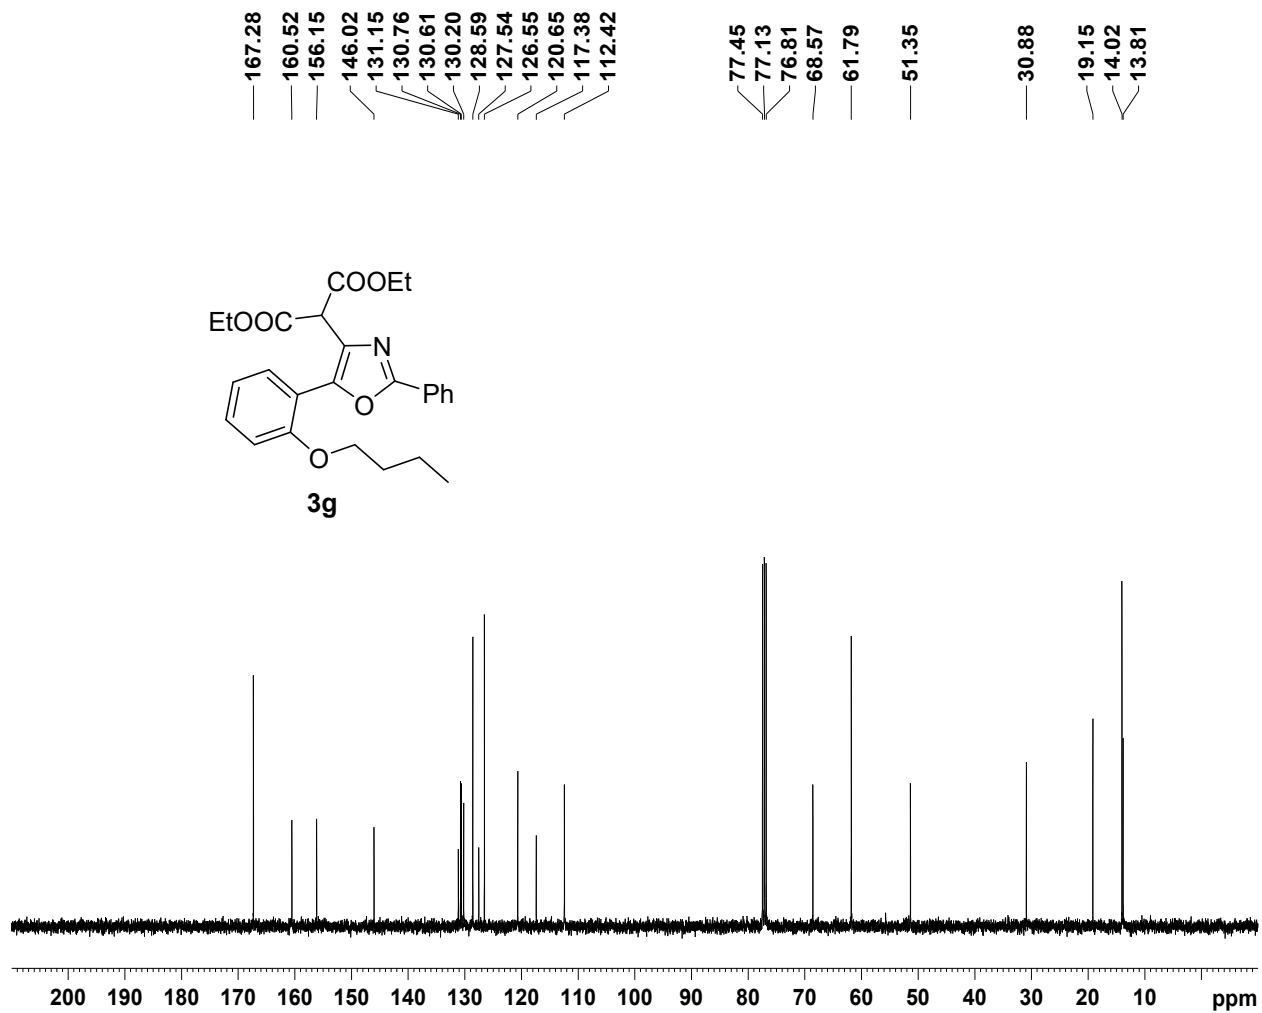

Figure S24. <sup>13</sup>C NMR (100 MHz, CDCl<sub>3</sub>) spectrum of **3g**

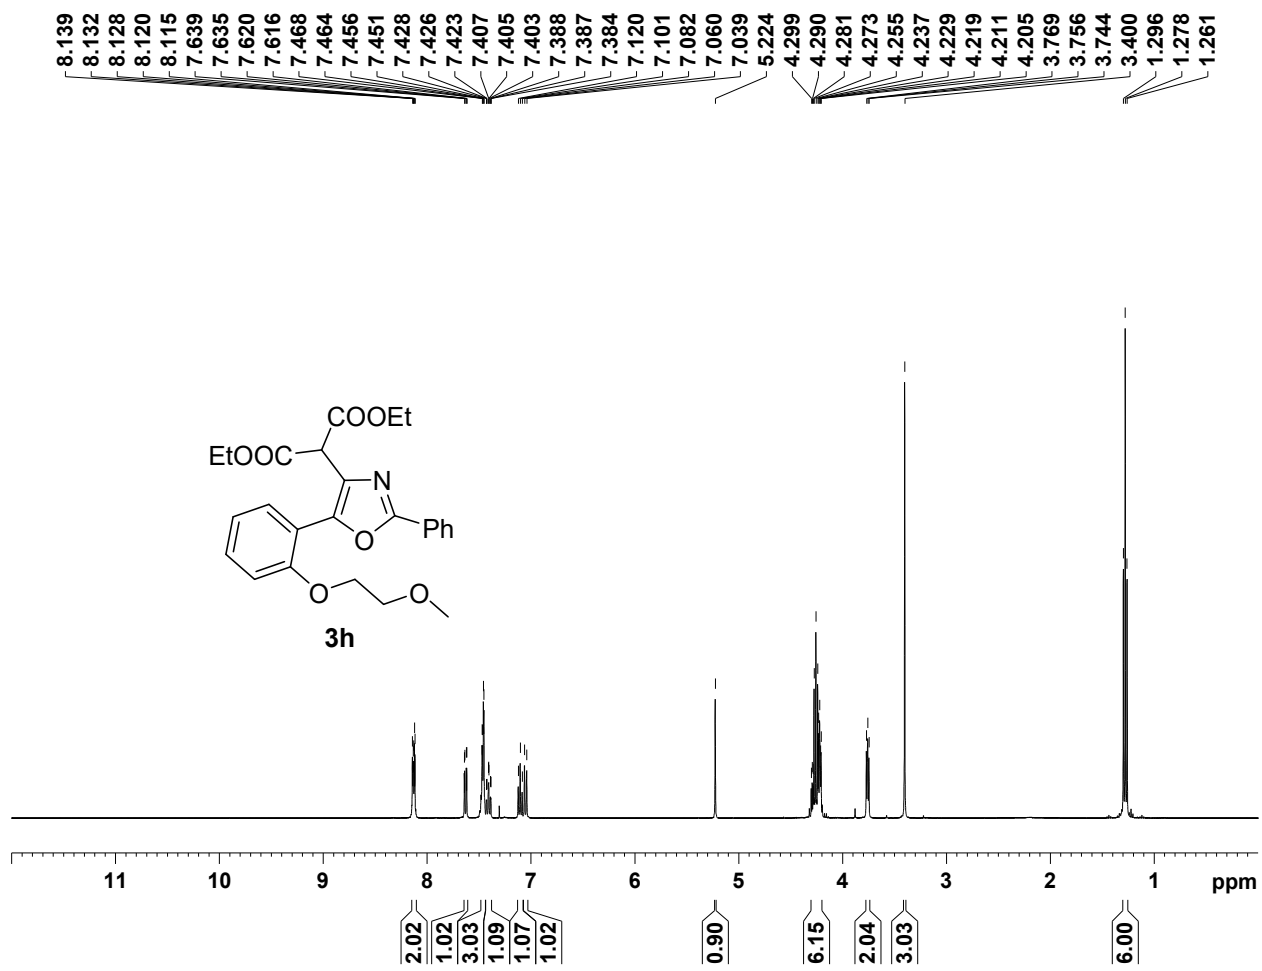

Figure S25. <sup>1</sup>H NMR (400 MHz, CDCl<sub>3</sub>) spectrum of **3h**

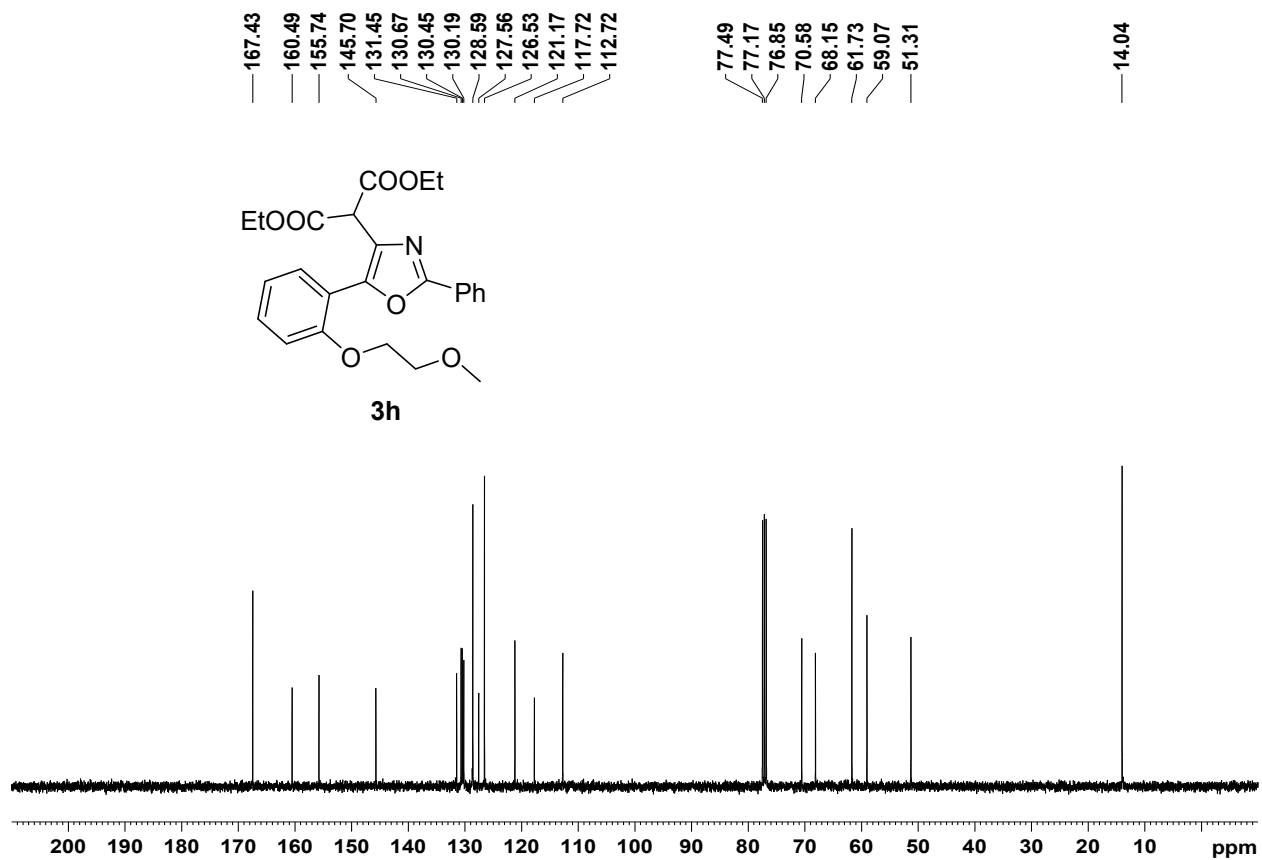

Figure S26. <sup>13</sup>C NMR (100 MHz, CDCl<sub>3</sub>) spectrum of **3h**

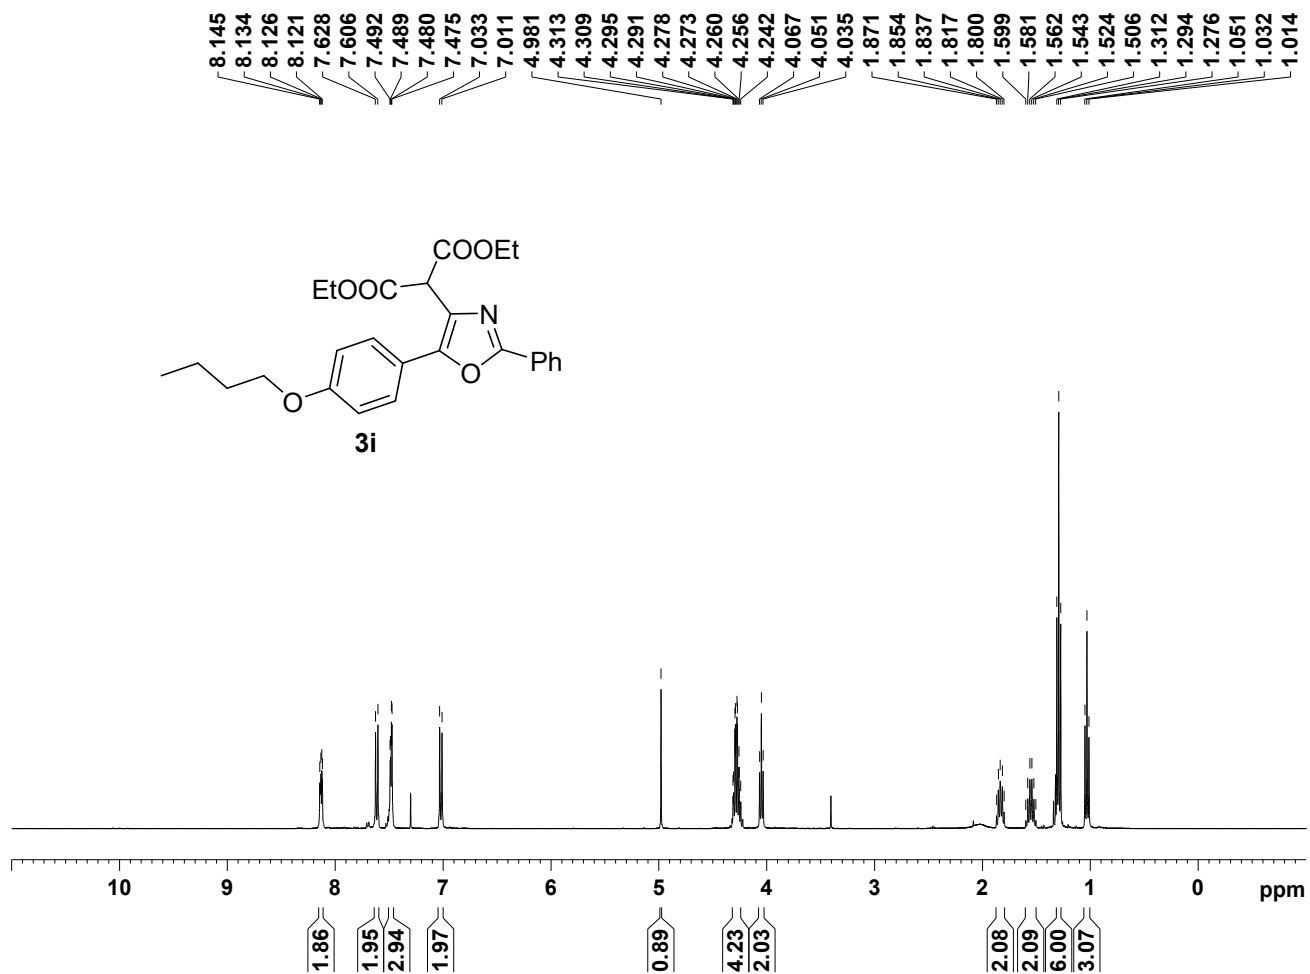

Figure S27. <sup>1</sup>H NMR (400 MHz, CDCl<sub>3</sub>) spectrum of **3i**

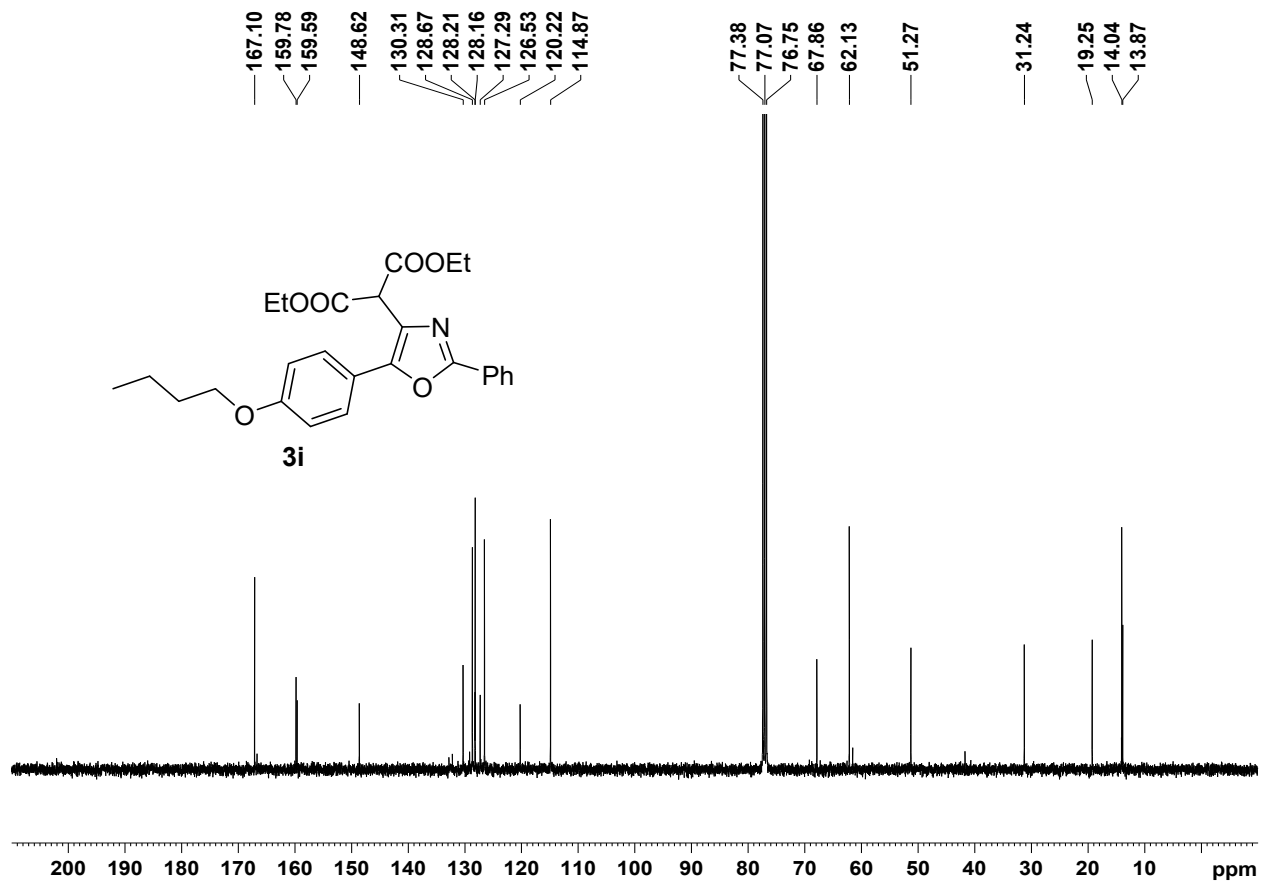

Figure S28. <sup>13</sup>C NMR (100 MHz, CDCl<sub>3</sub>) spectrum of **3i**

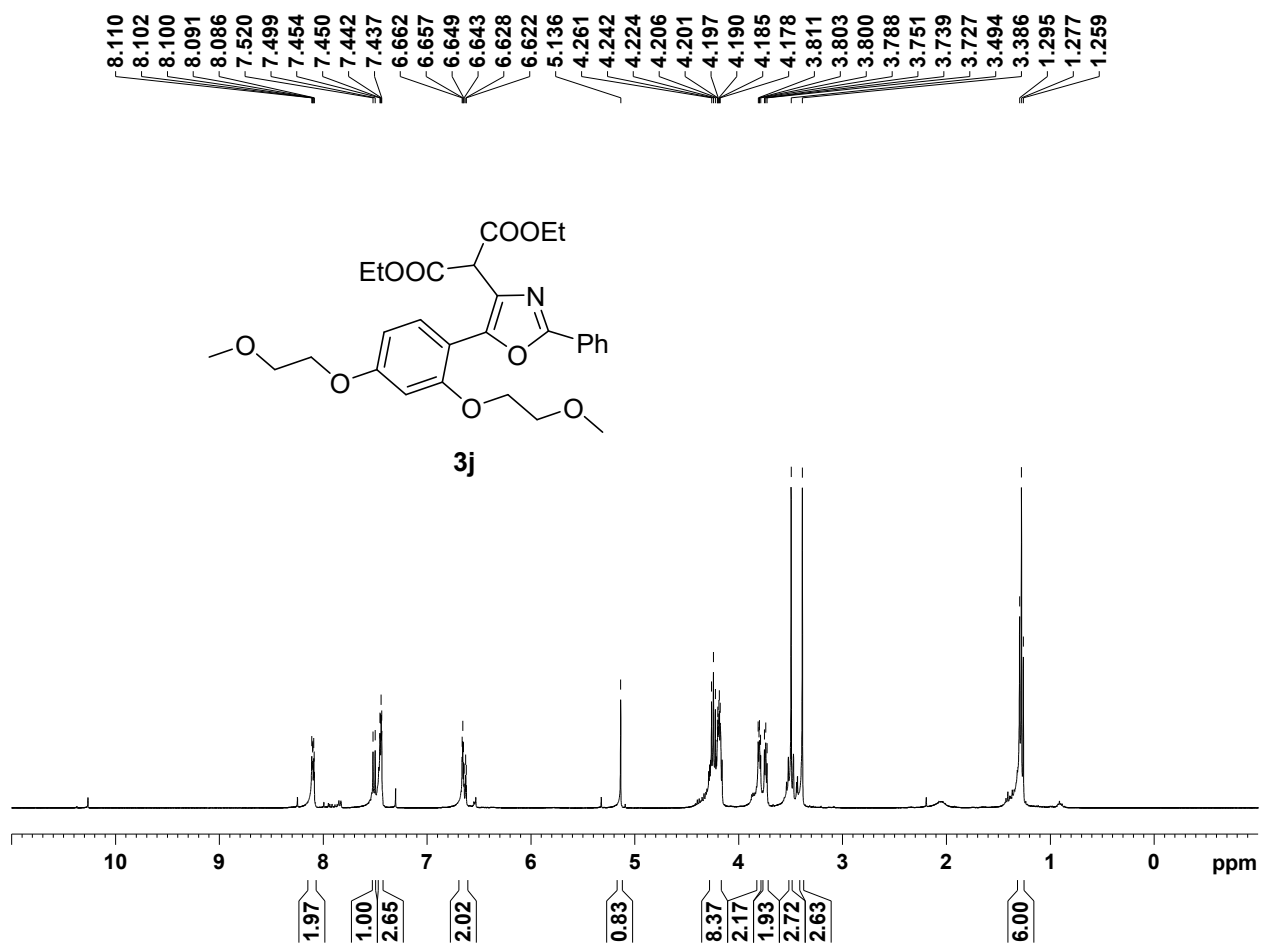

Figure S29. <sup>1</sup>H NMR (400 MHz, CDCl<sub>3</sub>) spectrum of **3j**

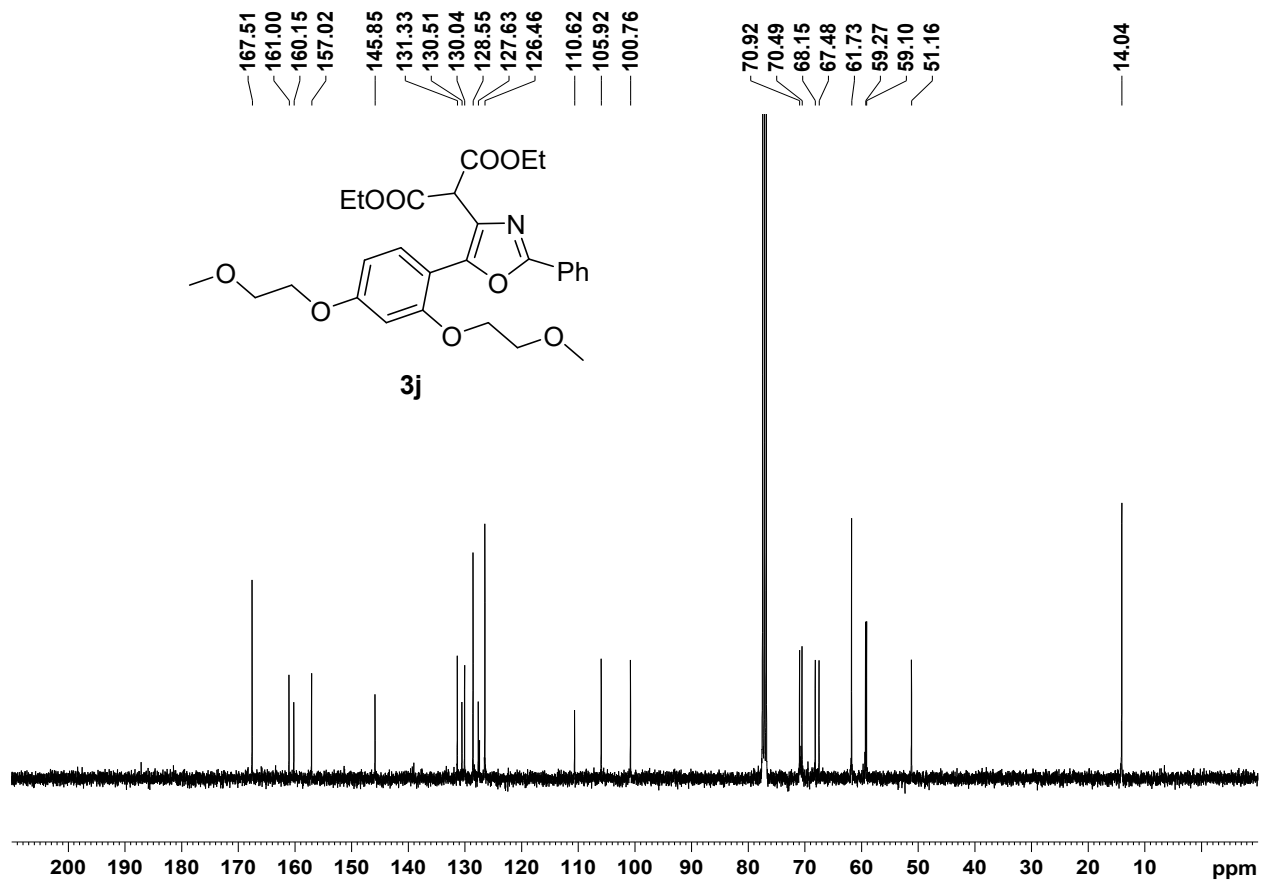

Figure S30. <sup>13</sup>C NMR (100 MHz, CDCl<sub>3</sub>) spectrum of **3j**

# C. Copies of HRMS

## Spectrum Plot Report

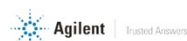

|                |        |              |               |            |         |                   |                     |
|----------------|--------|--------------|---------------|------------|---------|-------------------|---------------------|
| Name           | ON-1   | Rack Pos.    |               | Instrument | QTOF    | Operator          |                     |
| Inj. Vol. (ul) | 2      | Plate Pos.   |               | IRM Status | Success | Acq. Time (Local) | 07-12-2022 14:51:39 |
| Data File      | ON-1.d | Method (Acq) | GCN-NORMAL1.m | Comment    |         | (UTC-08:00)       |                     |

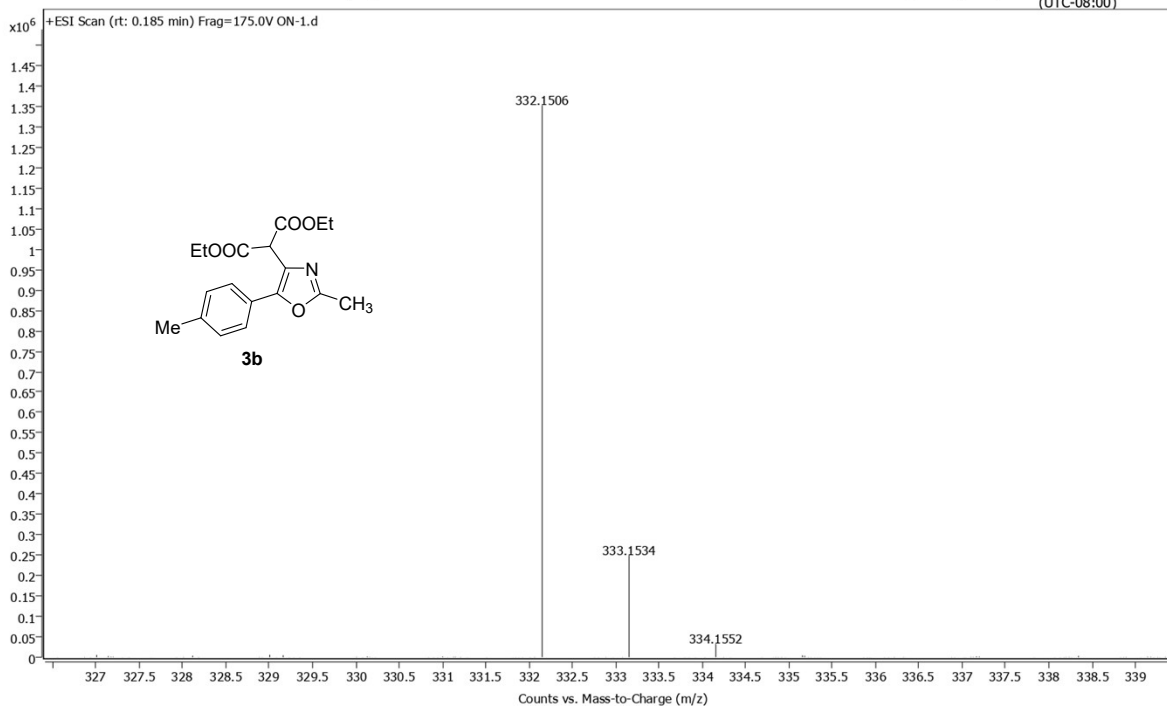

Figure S31. Mass spectrum of **3b**



# User Spectrum Plot Report

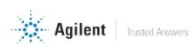

|                |        |              |               |            |         |                   |                                 |
|----------------|--------|--------------|---------------|------------|---------|-------------------|---------------------------------|
| Name           | ON-2   | Rack Pos.    |               | Instrument | QTOF    | Operator          |                                 |
| Inj. Vol. (ul) | 2      | Plate Pos.   |               | IRM Status | Success |                   |                                 |
| Data File      | ON-2.d | Method (Acq) | GCN-NORMAL1.m | Comment    |         | Acq. Time (Local) | 07-12-2022 14:37:49 (UTC-08:00) |

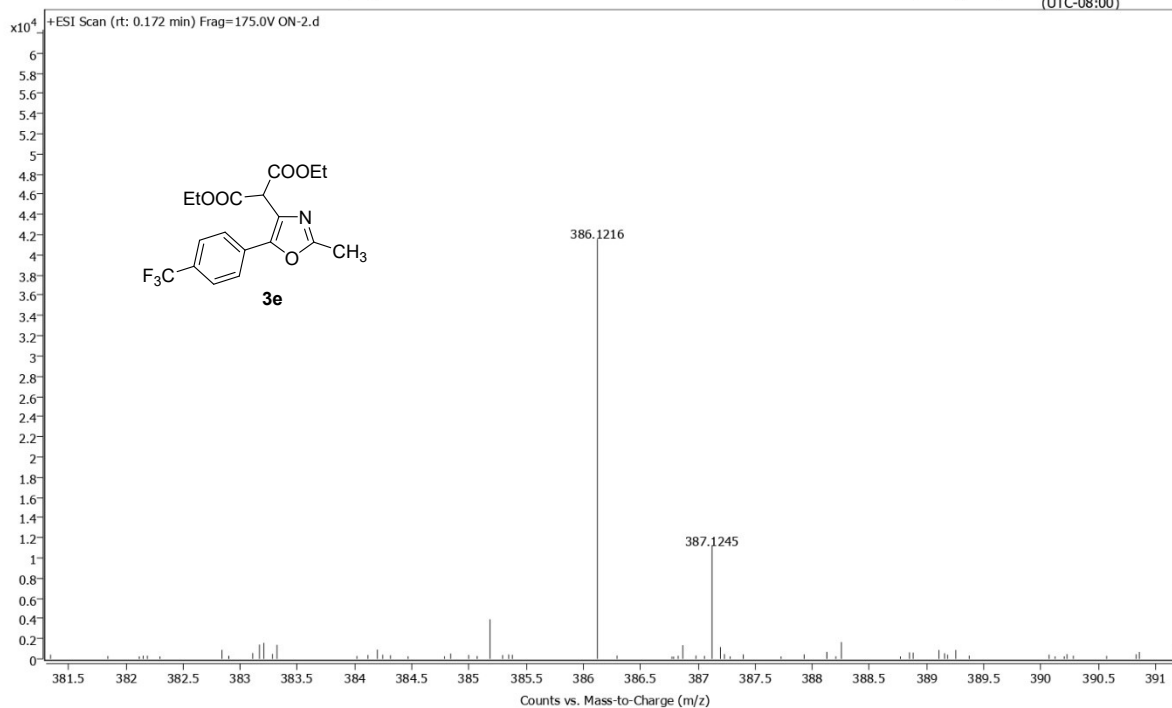

**Figure S32.** Mass spectrum of **3e**

# Spectrum Plot Report

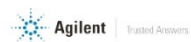

|                |        |              |               |            |         |                   |                     |
|----------------|--------|--------------|---------------|------------|---------|-------------------|---------------------|
| Name           | ON-4   | Rack Pos.    |               | Instrument | QTOF    | Operator          |                     |
| Inj. Vol. (ul) | 2      | Plate Pos.   |               | IRM Status | Success | Acq. Time (Local) | 07-12-2022 14:41:15 |
| Data File      | ON-4.d | Method (Acq) | GCN-NORMAL1.m | Comment    |         | (UTC-08:00)       |                     |

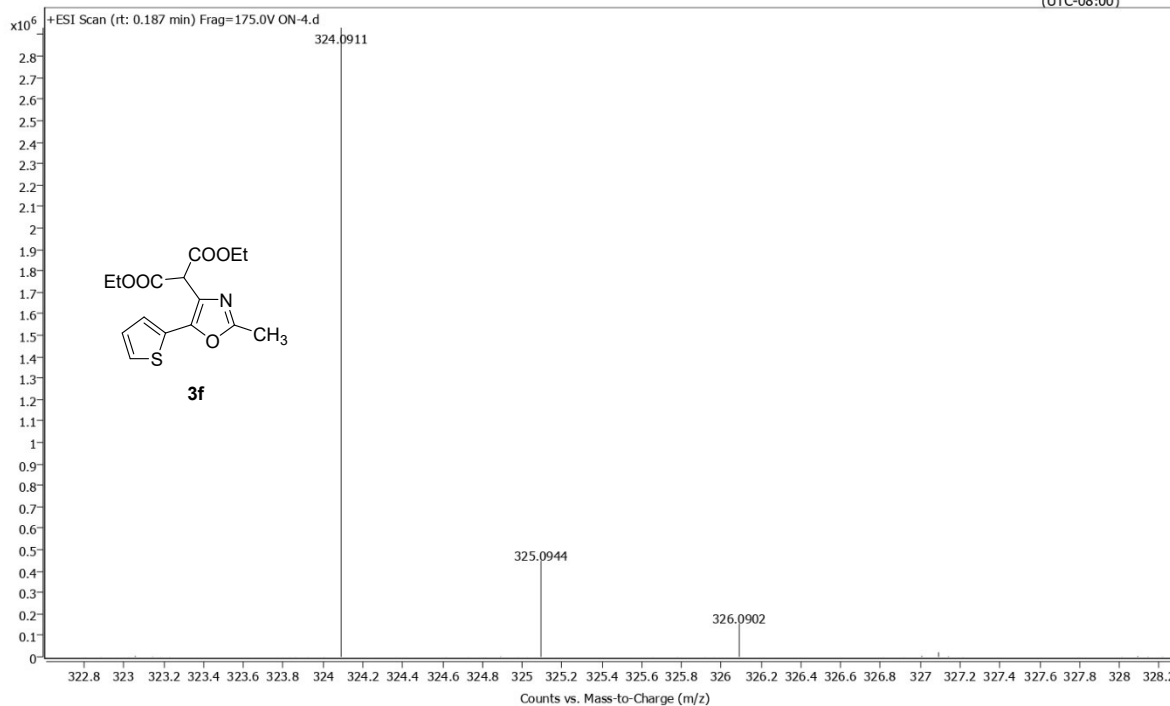

**Figure S33.** Mass spectrum of **3f**

# Spectrum Plot Report



|                |        |              |               |            |         |                   |                     |
|----------------|--------|--------------|---------------|------------|---------|-------------------|---------------------|
| Name           | ON-5   | Rack Pos.    |               | Instrument | QTOF    | Operator          |                     |
| Inj. Vol. (ul) | 2      | Plate Pos.   |               | IRM Status | Success | Acq. Time (Local) | 07-12-2022 14:42:59 |
| Data File      | ON-5.d | Method (Acq) | GCN-NORMAL1.m | Comment    |         | (UTC-08:00)       |                     |

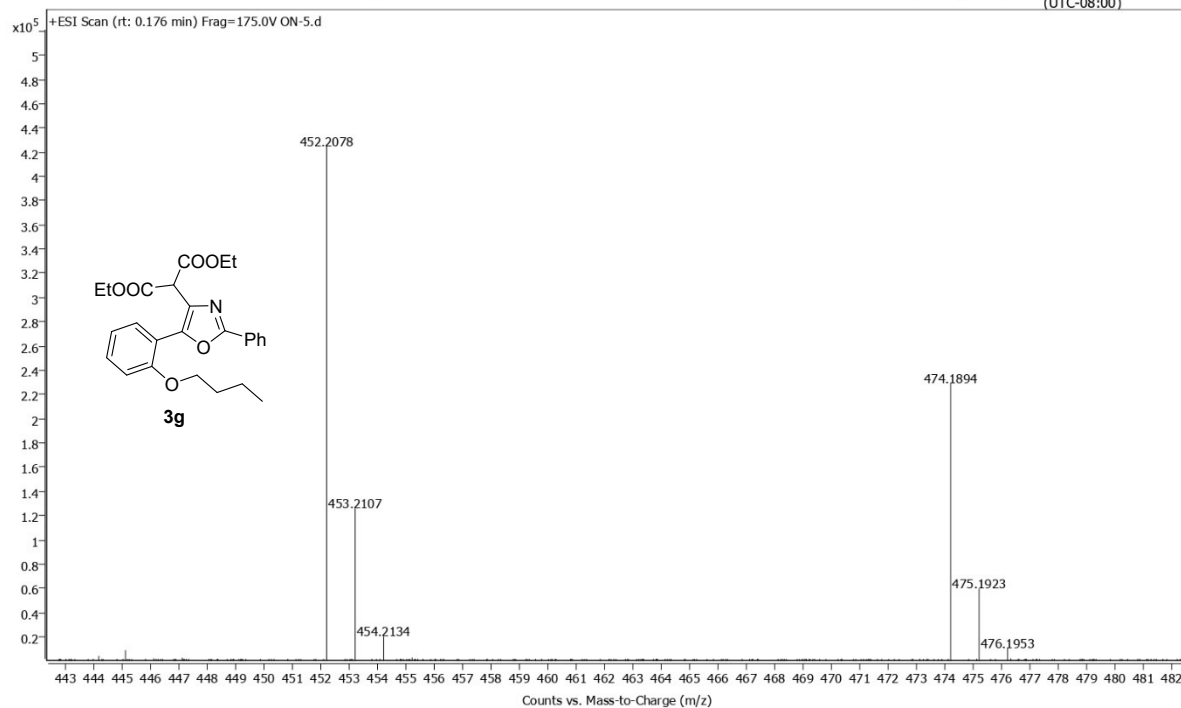

**Figure S34.** Mass spectrum of **3g**

# Spectrum Plot Report

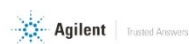

|                |        |              |               |            |         |                   |                     |
|----------------|--------|--------------|---------------|------------|---------|-------------------|---------------------|
| Name           | ON-6   | Rack Pos.    |               | Instrument | QTOF    | Operator          |                     |
| Inj. Vol. (ul) | 2      | Plate Pos.   |               | IRM Status | Success | Acq. Time (Local) | 07-12-2022 14:44:43 |
| Data File      | ON-6.d | Method (Acq) | GCN-NORMAL1.m | Comment    |         | (UTC-08:00)       |                     |

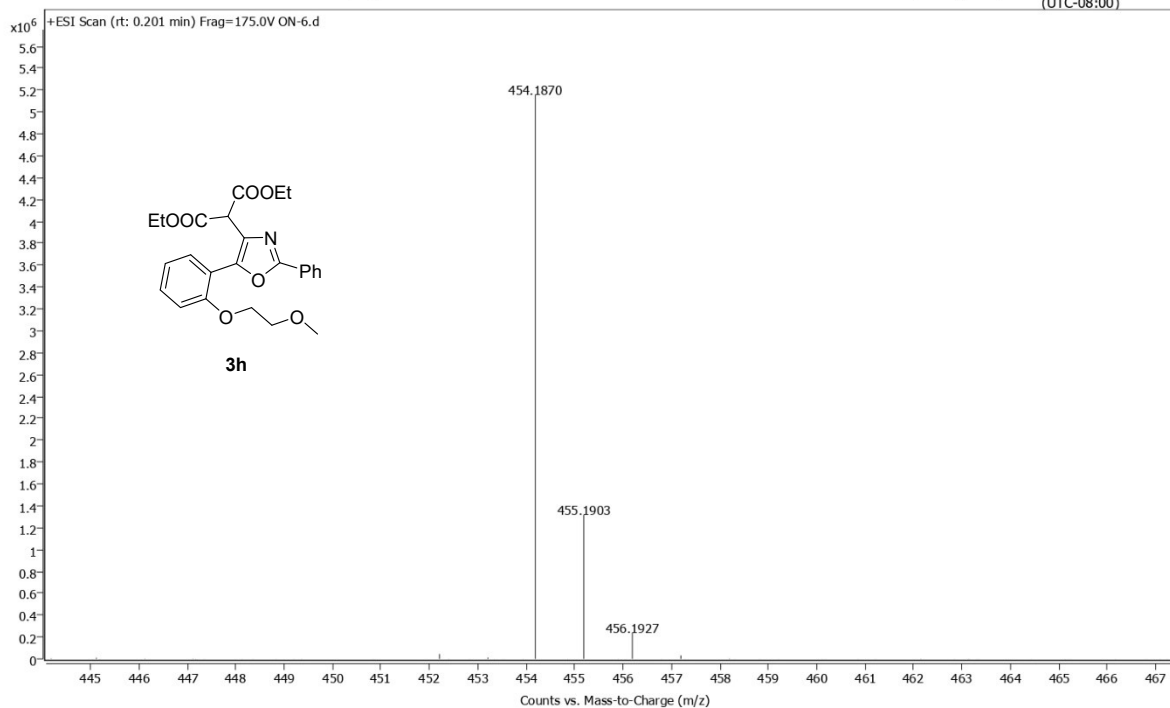

**Figure S35.** Mass spectrum of **3h**

# Spectrum Plot Report

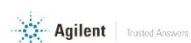

|                |        |              |               |            |         |                   |                     |
|----------------|--------|--------------|---------------|------------|---------|-------------------|---------------------|
| Name           | ON-7   | Rack Pos.    |               | Instrument | QTOF    | Operator          |                     |
| Inj. Vol. (ul) | 2      | Plate Pos.   |               | IRM Status | Success | Acq. Time (Local) | 07-12-2022 14:46:28 |
| Data File      | ON-7.d | Method (Acq) | GCN-NORMAL1.m | Comment    |         | (UTC-08:00)       |                     |

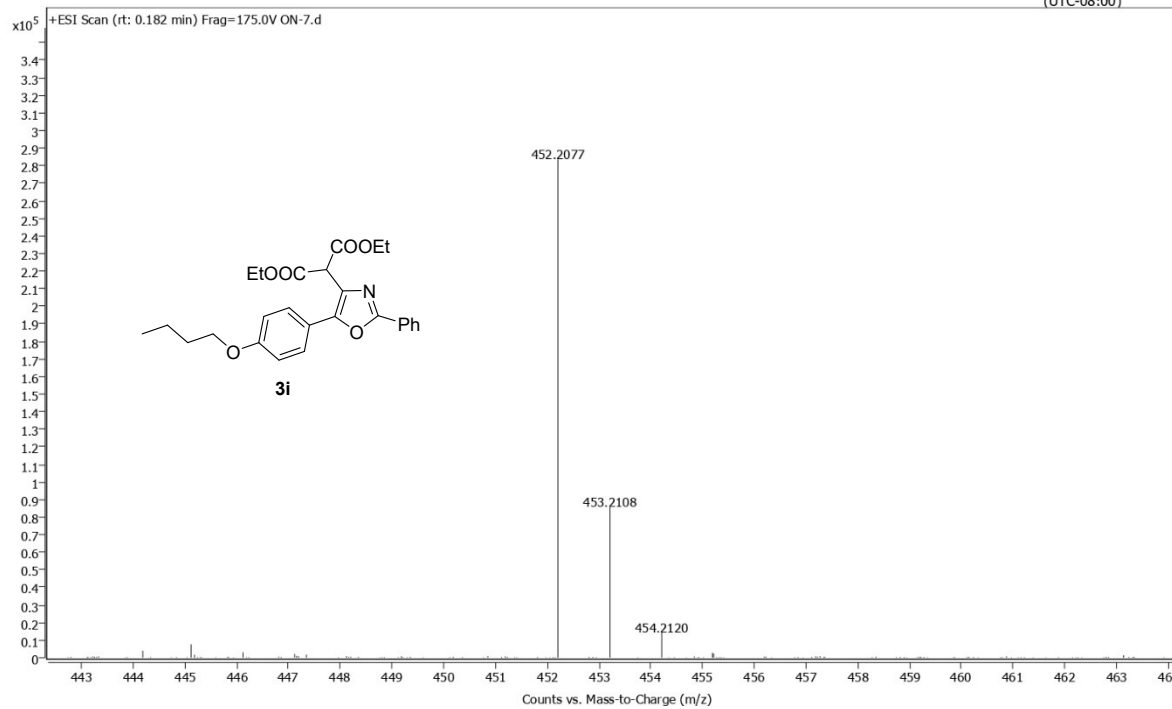

**Figure S36.** Mass spectrum of **3i**

# Spectrum Plot Report



|                |        |              |               |            |         |                   |                     |
|----------------|--------|--------------|---------------|------------|---------|-------------------|---------------------|
| Name           | ON-9   | Rack Pos.    |               | Instrument | QTOF    | Operator          |                     |
| Inj. Vol. (ul) | 2      | Plate Pos.   |               | IRM Status | Success | Acq. Time (Local) | 07-12-2022 14:49:55 |
| Data File      | ON-9.d | Method (Acq) | GCN-NORMAL1.m | Comment    |         | (UTC-08:00)       |                     |

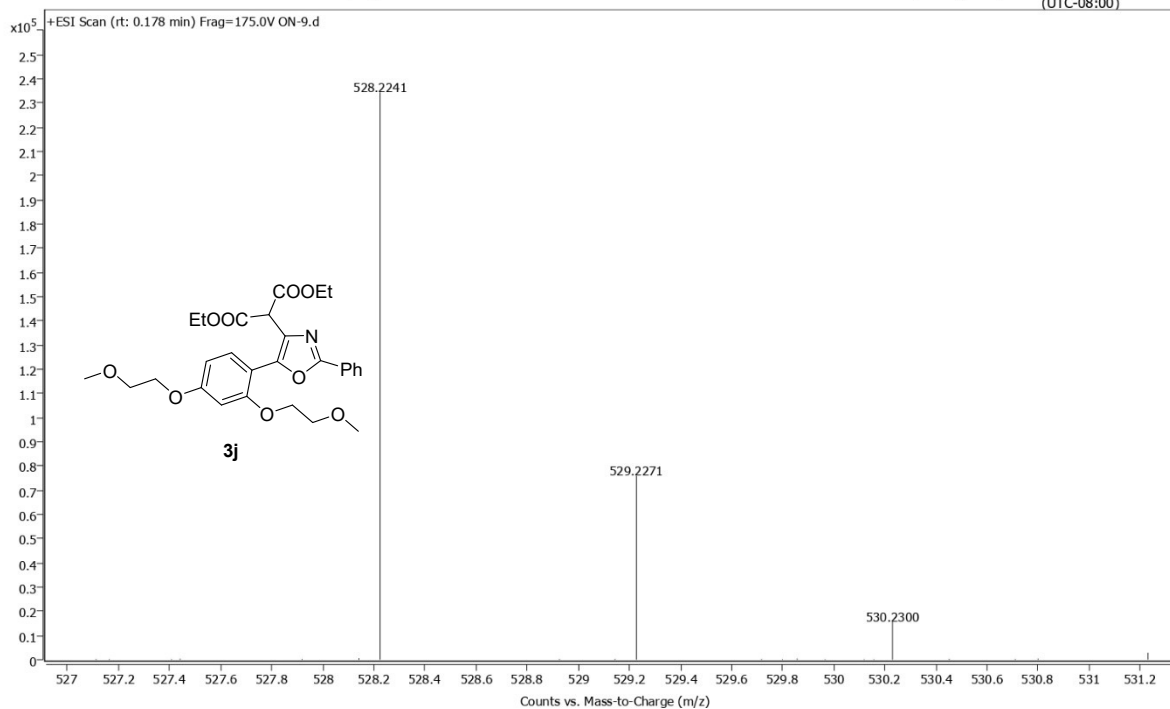

**Figure S37.** Mass spectrum of **3j**

## HPLC Analysis of Compound 3a Used for *In-vitro* Analysis

System : Waters Breeze™2  
Waters 1525 Binary HPLC Pump

Detector : 2998 Photodiode Array Detector

Column : Name: Symmetry® C18 3.5µm  
Dimension: 4.6mm x 75 mm coloumn

### Test Method

Mobile phase : 80/20 Acetonitrile /water

Mode : Isocratic system

Flow rate : 1 mL/min

Injection Volume : 10µL

Retention Time : 1.675 min

Purity (area%) : 99.25%

SAMPLE INFORMATION

|                   |               |                  |                                      |
|-------------------|---------------|------------------|--------------------------------------|
| Sample Name:      | 3a_26.July    | Acquired By:     | Breeze                               |
| Sample Type:      | Unknown       | Date Acquired:   | 7/26/2023 11:08:59 AMIST             |
| Vial:             | 1             | Acq. Method:     | 80%ACN_20%H <sub>2</sub> O_3a_26JULY |
| Injection#:       | 1             | Date Processed:  | 7/26/2023 11:30:28 AMIST             |
| Injection Volume: | 10.00 ul      | Channel Name:    | FDA Max Plot 190.0 - 800.0           |
| Run Time:         | 10.00 Minutes | Channel Desc.:   | 2998 (210-400)nm                     |
| Column Type:      |               | Sample Set Name: |                                      |

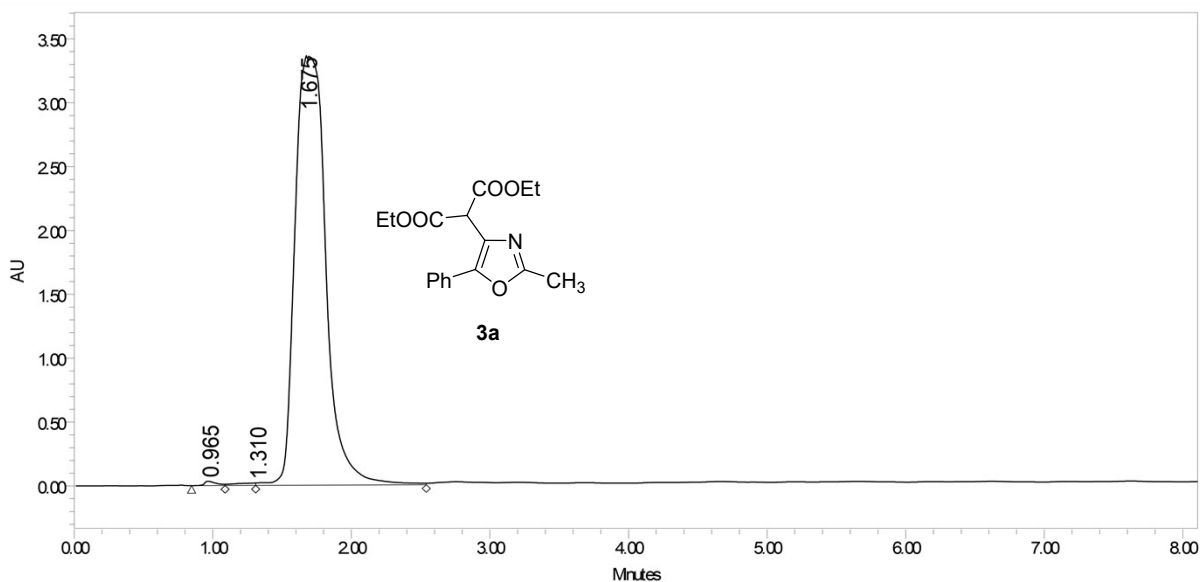

|   | RT (min) | Area (µV*sec) | %Area | Height (µV) | % Height |
|---|----------|---------------|-------|-------------|----------|
| 1 | 0.965    | 200297        | 0.36  | 34258       | 1.00     |
| 2 | 1.310    | 193691        | 0.37  | 19165       | 0.56     |
| 3 | 1.675    | 52105844      | 99.25 | 3361794     | 98.44    |

Figure S38. HPLC chromatogram of 3a



### Results of *In-silico* Analysis of Hypothetical Products 3k-l

**Table 1.** Docking score of hypothetical products 3k-l

| S.NO. | Compound                                                                            | Molecular Weight (g/mol) | Binding Energy (Kcal/mol) | Interactive Residues                                        |
|-------|-------------------------------------------------------------------------------------|--------------------------|---------------------------|-------------------------------------------------------------|
| 3k    | 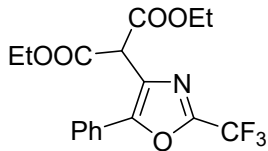   | 371.3122                 | -6.6                      | ARG216, GLY144, GLY146, GLY209, VAL147, VAL68               |
| 3l    |    | 331.3680                 | -6.4                      | ASN58, ASN206, GLY146, ILE57, ILE73, ILE203, THR56, VAL68   |
| 3m    |   | 261.2330                 | -6.8                      | GLY144, ILE73, ILE205, THR56, VAL68, VAL147                 |
| 3n    |  | 217.2240                 | -6.3                      | GLY144, ILE73, ILE205, THR56, VAL68                         |
| 3o    |  | 259.2650                 | -7.0                      | ASN206, GLY209, HIS201, ILE73, ILE205, MET149, PHE77, VAL68 |
| 3p    |  | 216.2400                 | -6.2                      | GLY209, HIS201, ILE205, ILE73, PHE77, MET149, VAL68         |

**Table 2.** Physicochemical properties calculated for oxazoles **3k-l** using Qikpro

| Compound  | Molecular Weight | QPlogS | QPlogHERG | QPPCaco  | QPPMDCK  | QPlogKp | QPlogPo/w | Human Oral Absorption | Rule of Five |
|-----------|------------------|--------|-----------|----------|----------|---------|-----------|-----------------------|--------------|
| <b>3k</b> | 371.3122         | -5.548 | -5.819    | 1709.024 | 4092.338 | -1.943  | 3.975     | 100                   | 0            |
| <b>3l</b> | 331.3680         | -4.983 | -5.826    | 1629.892 | 838.768  | -1.826  | 3.625     | 100                   | 0            |
| <b>3m</b> | 261.2330         | -2.796 | -0.957    | 11.335   | 6.314    | -3.944  | 2.617     | 61.142                | 0            |
| <b>3n</b> | 217.2240         | -2.744 | -2.574    | 227.391  | 126.922  | -2.658  | 2.218     | 82.116                | 0            |
| <b>3o</b> | 259.2650         | -0.863 | -1.956    | 38.472   | 56.624   | -4.170  | -0.079    | 54.856                | 0            |
| <b>3p</b> | 216.2400         | -1.556 | -3.145    | 409.513  | 383.624  | -2.754  | 0.794     | 78.347                | 0            |

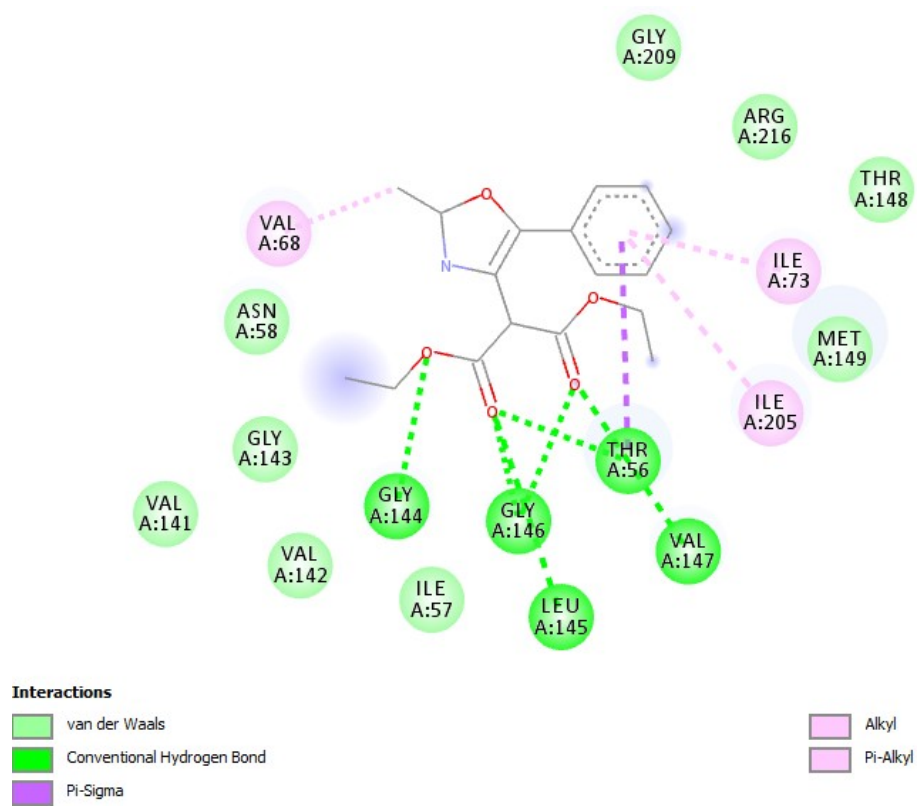

**Figure S39.** 2D interaction diagram of **3a** with AQP4

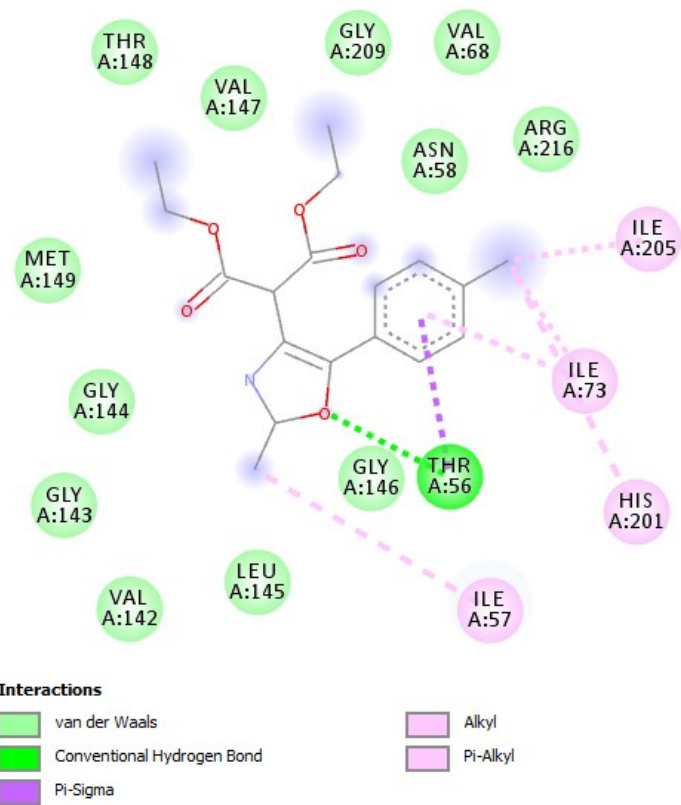

**Figure S40.** 2D interaction diagram of **3b** with AQP4

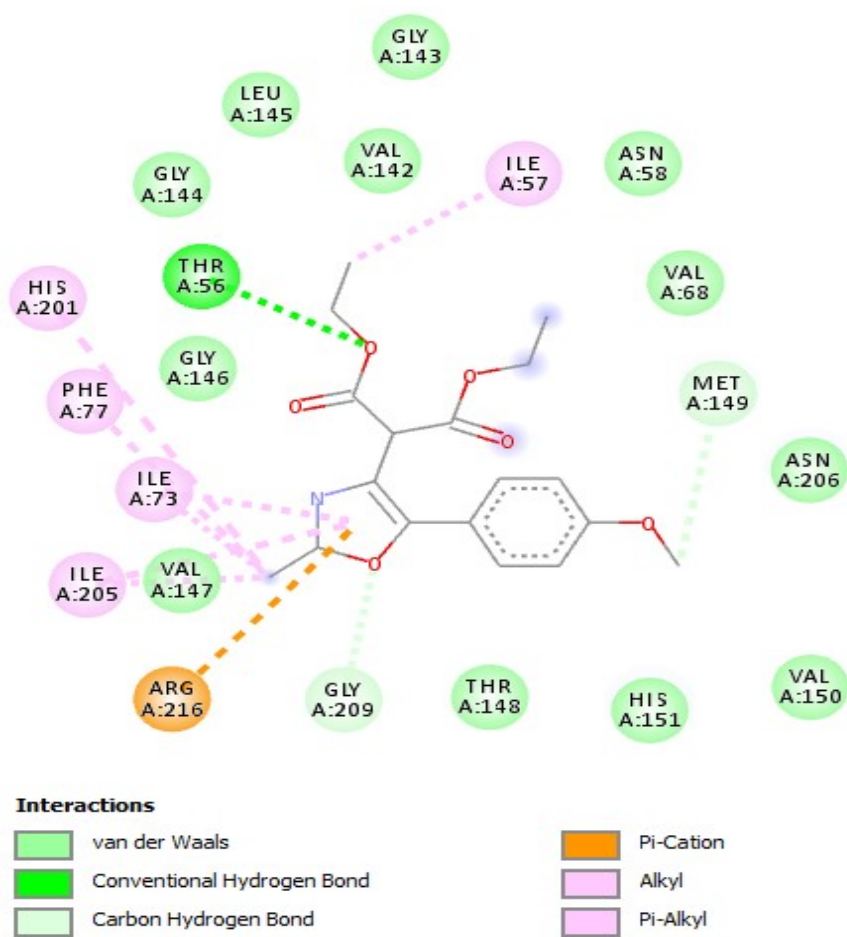

**Figure S41.** 2D interaction diagram of **3c** with AQP4

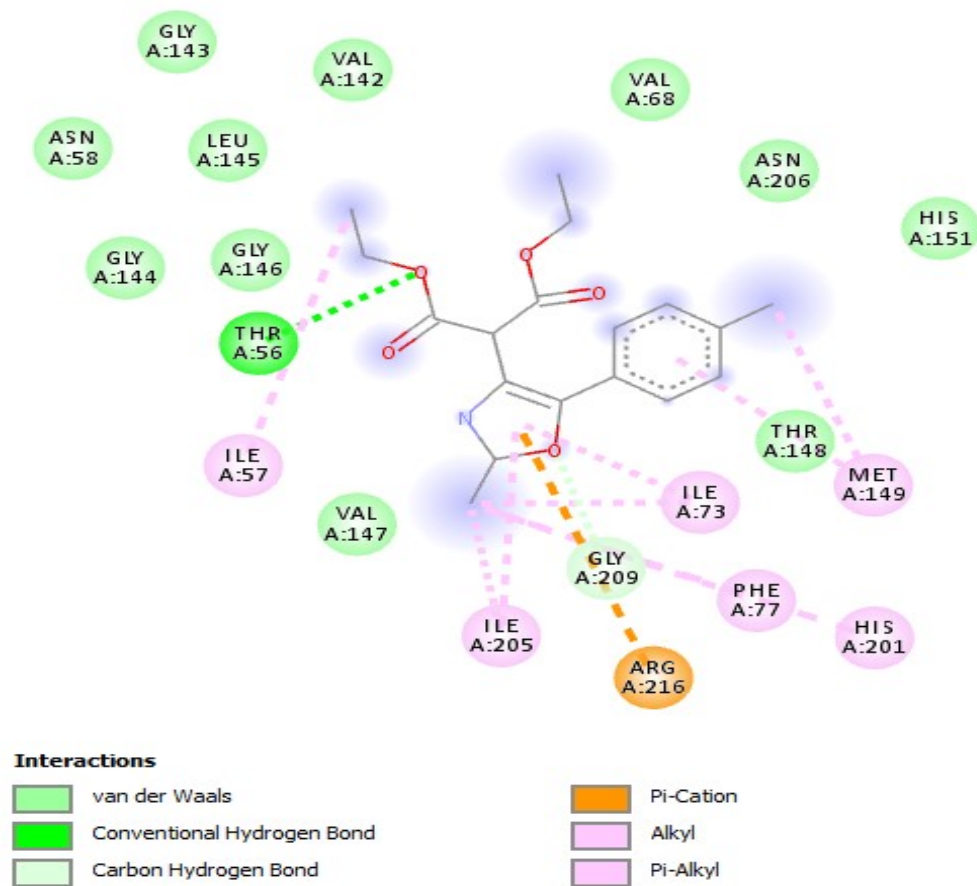

**Figure S42.** 2D interaction diagram of **3d** with AQP4

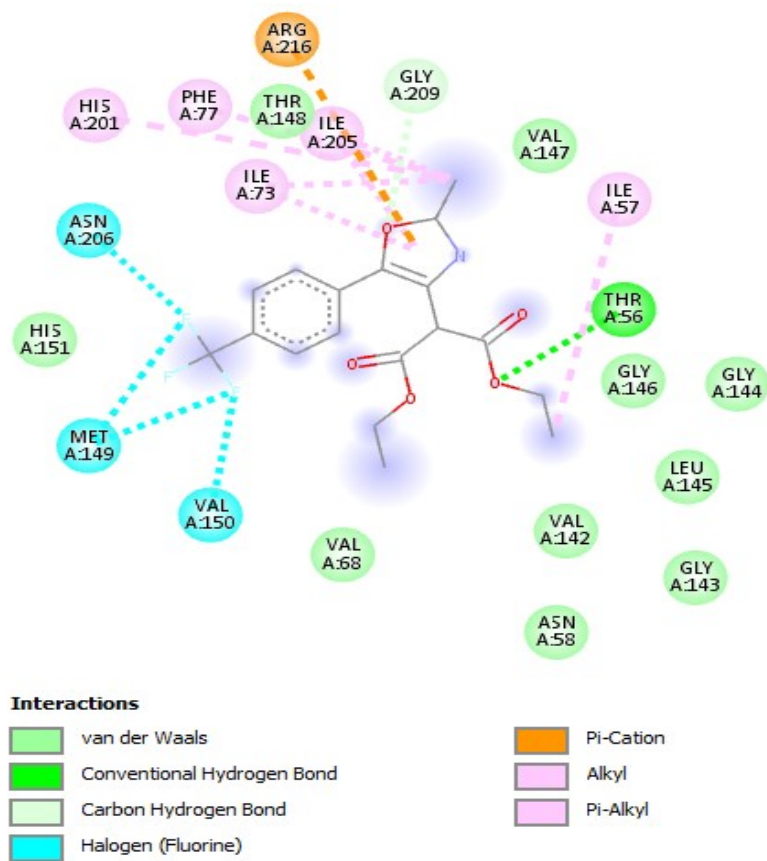

**Figure S43.** 2D interaction diagram of **3e** with AQP4

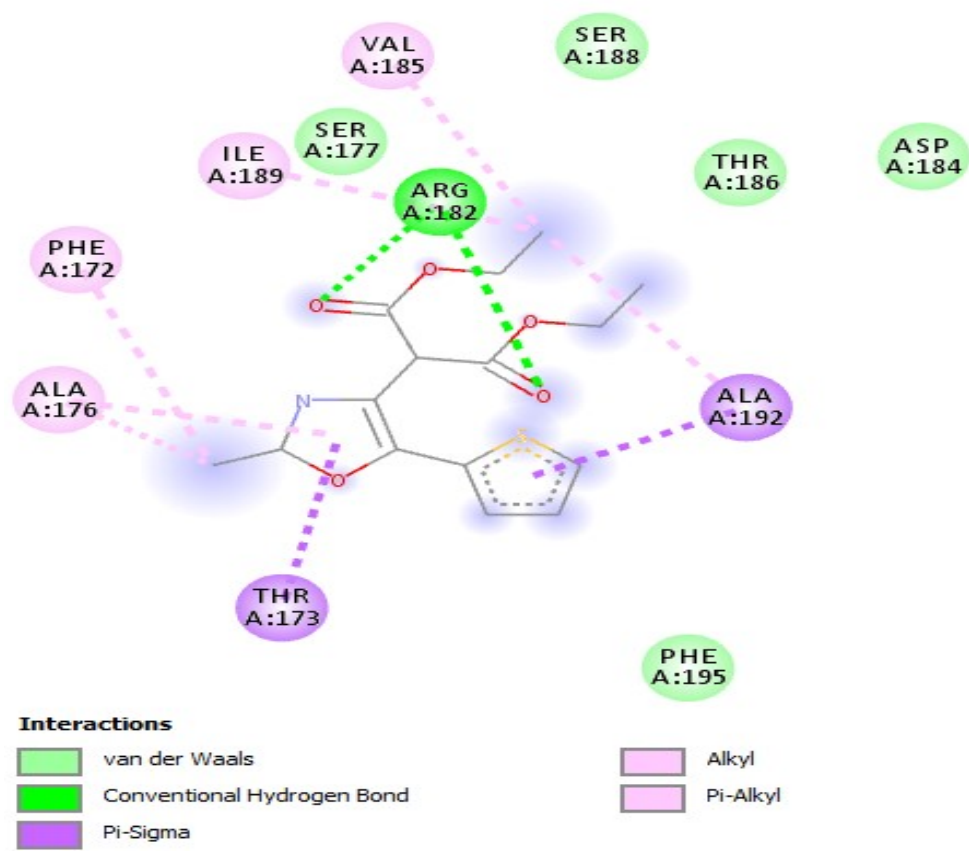

Figure S44. 2D interaction diagram of **3f** with AQP4



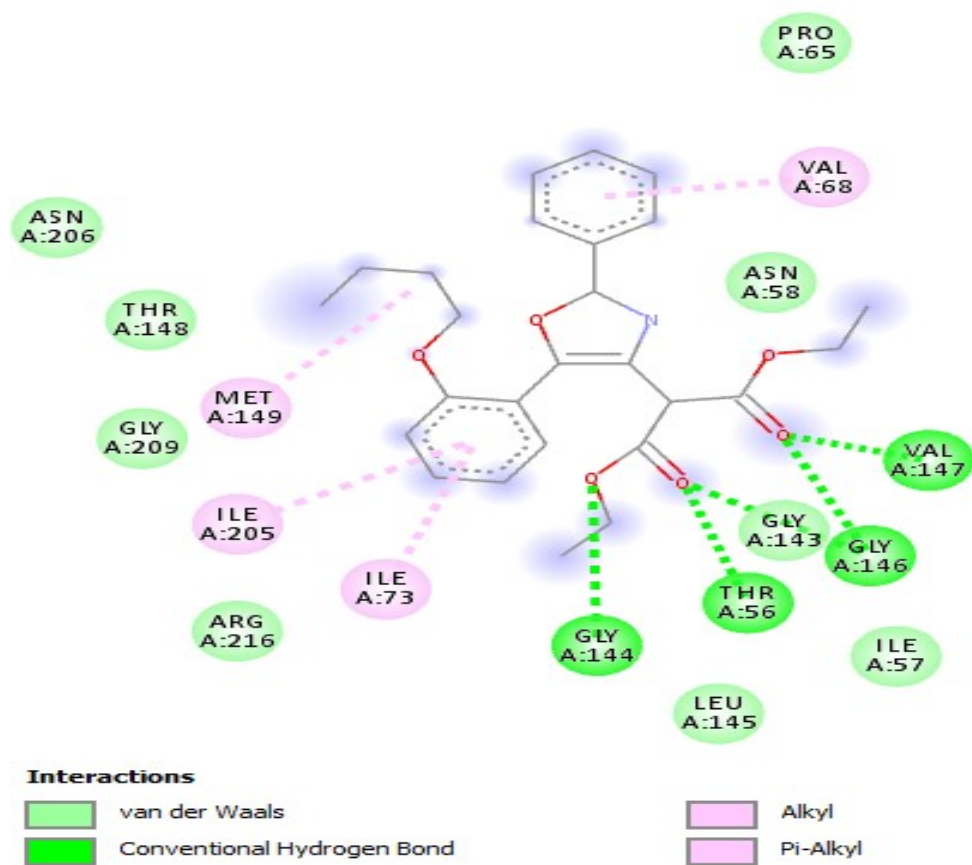

**Figure S45.** 2D interaction diagram of **3g** with AQP4

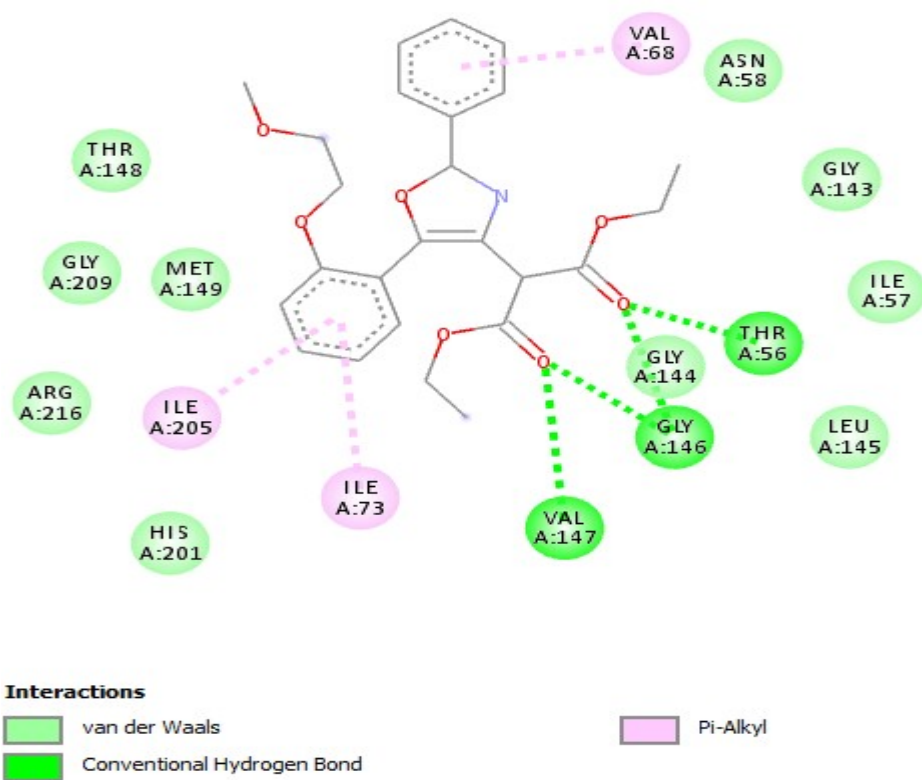

**Figure S46.** 2D interaction diagram of **3h** with AQP4

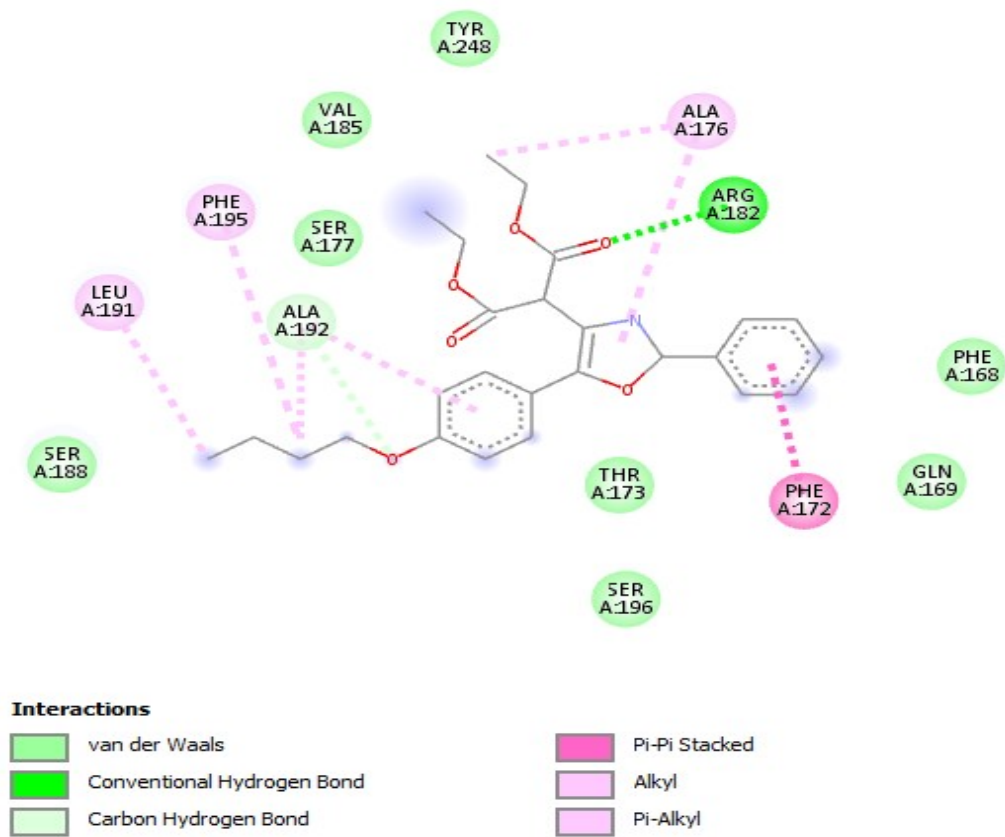

**Figure S47.** 2D interaction diagram of **3i** with AQP4

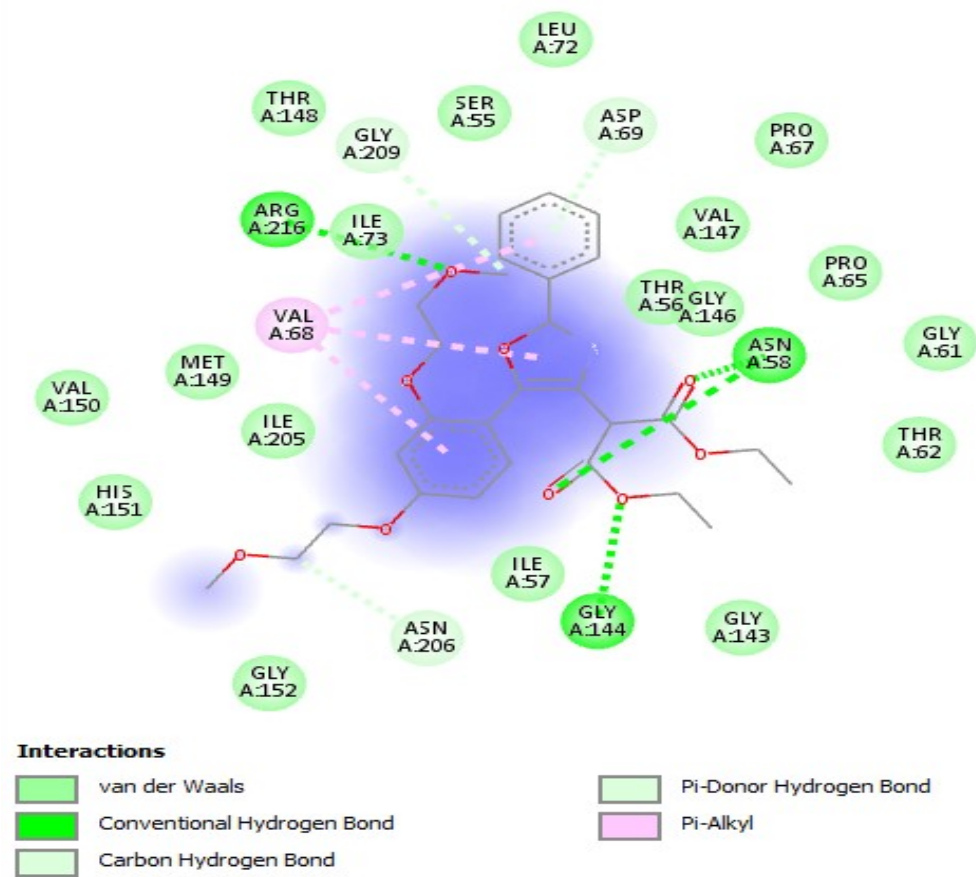

**Figure S48.** 2D interaction diagram of **3j** with AQP4

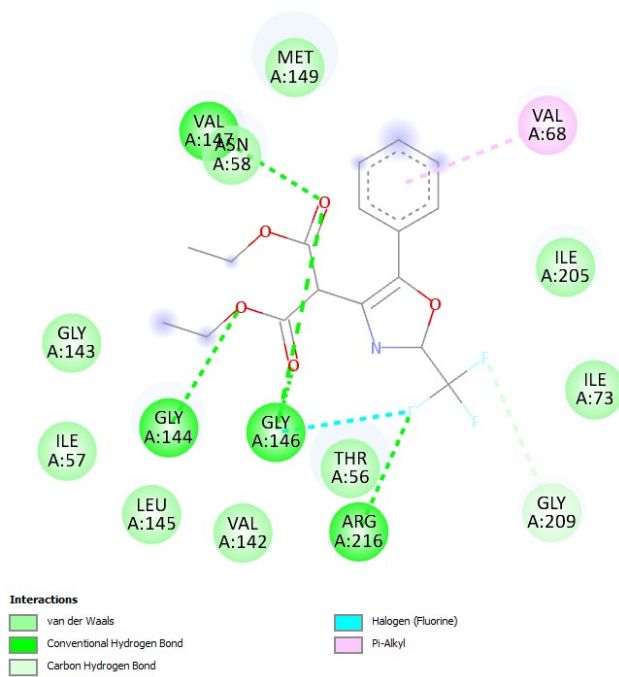

**Figure S49.** 2D interaction diagram of **3k** with AQP4

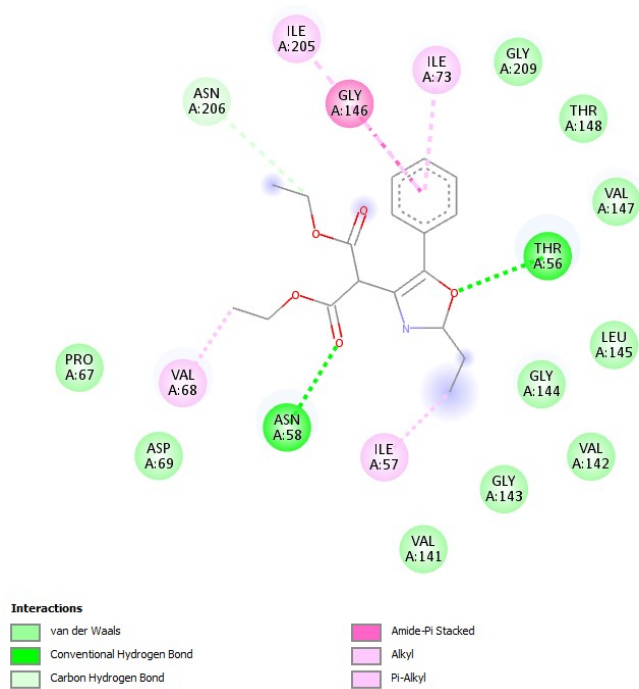

**Figure S50.** 2D interaction diagram of **31** with AQP4

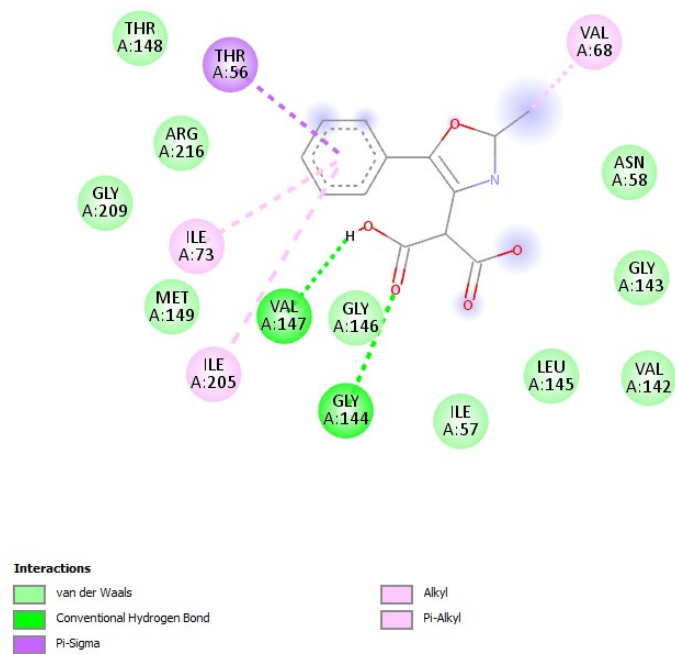

**Figure S51.** 2D interaction diagram of **3m** with AQP4

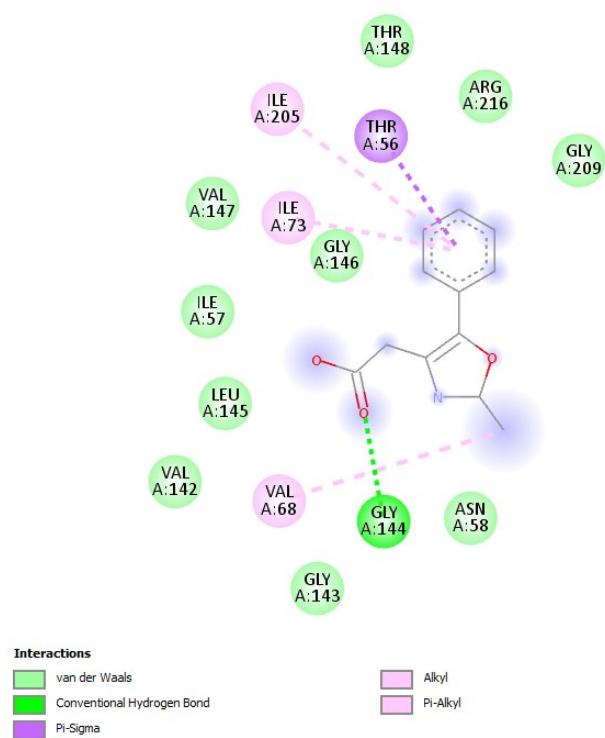

**Figure S52.** 2D interaction diagram of **3n** with AQP4



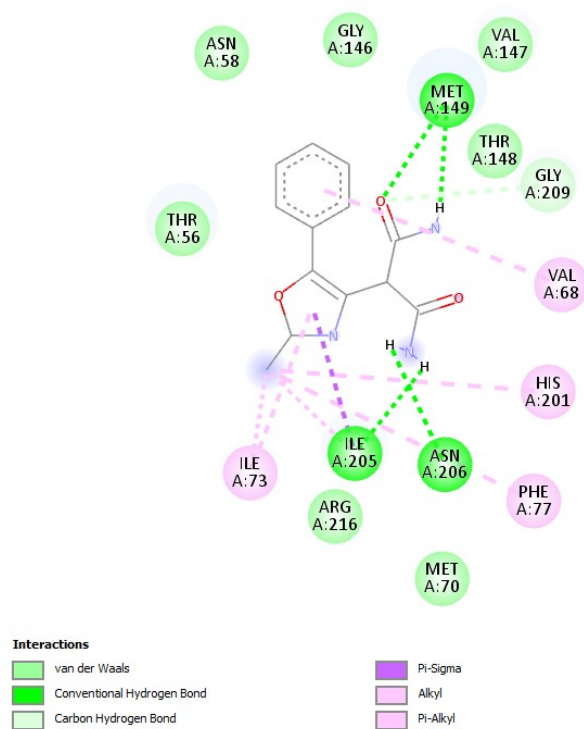

**Figure S53.** 2D interaction diagram of **3o** with AQP4

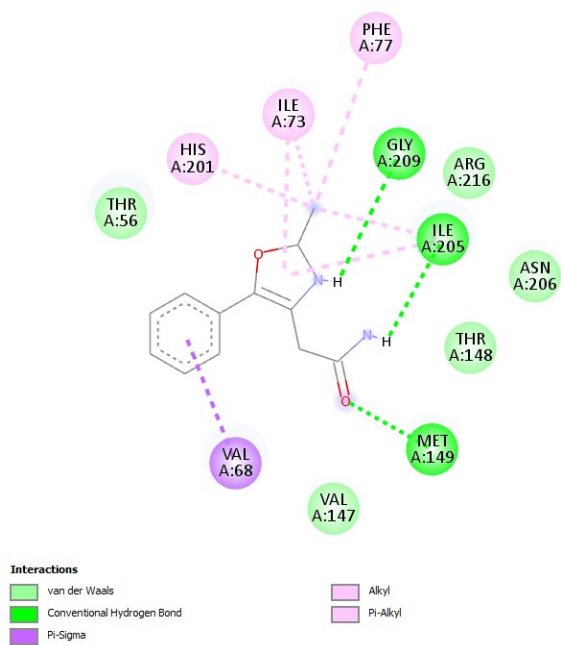

**Figure S54.** 2D interaction diagram of **3p** with AQP4
